# Supplementary material
Source: PubMed Central journal article supplement (PMC3343350)

1 **Supplementary Information**

2 **Supplementary Methods**

3 **Sequence processing and taxonomic assignment**

4 After filtering the sequences in MOTHUR, reads with ambiguous base calls, average  
5 quality scores below 25 and homopolymers longer than 10 were eliminated. Bacterial V1-  
6 V2 regions of the 16S rRNA gene were verified and extracted using V-XTRACTOR 2.0 [1].  
7 High quality sequences were queried against GREENGENES [2] using a naïve Bayesian  
8 classifier implemented in MOTHUR and a minimum bootstrap support of 60%. Similar  
9 sequences were clustered into operational taxonomic units (OTUs) using an unsupervised  
10 Bayesian clustering approach implemented in CROP [3] and the default threshold for  
11 species level. The consensus taxonomy of each OTU was determined using MOTHUR, as  
12 the taxonomic path represented by at least 51% of the sequences within the OTU.  
13 Abundance of OTUs at specific taxonomic ranks, species, genus, family, order, class, and  
14 phylum was determined and used to generate rank-specific matrices permitting  
15 downstream analyses of indicators at each taxonomic rank.

16

17 **Multivariate analysis of community structures and diversity**

18 Data were standardized by dividing the number of reads in each taxonomic unit by the  
19 total number of reads in each sample. A resemblance matrix was calculated using Bray-  
20 Curtis similarities [4] based on the standardized data. Principal Coordinate Analysis  
21 (PCO, [5]) implemented in the PRIMER6+ was used to display similarities in microbial  
22 community structures among all fecal and ileal samples. Tests of the multivariate null  
23 hypotheses of no differences among *a priori* defined groups were examined using

24 permutational multivariate analysis of variance (PERMANOVA, [6]). PERMANOVA  
25 was performed with 9,999 permutations and run in the PRIMER6+ software package.  
26 Residuals of raw data were permuted under a reduced model and partitioning was  
27 performed using Type III sums of squares. Pseudo-F values were reported to indicate the  
28 effects strength ( $F > 1$  indicates an effect) and P(Perm) values were reported to indicate the  
29 permutation-based p-value, which is the accurate value based on the 9,999 permutations  
30 run as described above. Bray Curtis similarity indices were reported to describe the  
31 average pairwise distance between the treatment groups analyzed. PCO ordination was  
32 plotted with STATISTICA 8.0 (StatSoft, Tulsa, OK). Simpson's diversity index [7] was  
33 used to calculate community diversity between treatment groups.

34

### 35 **Identification of bacterial indicators**

36 Taxa-treatment association analysis was based on the point biserial correlation coefficient  
37 [8] and used to determine the association strength (R) of each taxonomic unit with *a*  
38 *priori* groups. The analysis was based on fecal data obtained for each group (control,  
39 vancomycin and streptomycin-treated). This analysis was performed at each taxonomic  
40 level, from phylum to individual OTU. All possible combinations of *a priori* groups were  
41 analyzed to account for different niche breadths of the taxonomic units [9]. Correlation  
42 analysis was performed on each taxonomic unit using the diagnostic species analysis  
43 routine implemented in GINKGO [10] with 999,999 permutations. False discovery rate  
44 (FDR) correction was used to re-calculate these probabilities and draw experiment-wide  
45 conclusions [11]. Based on the P value distribution, Q values were determined using the

46 software QUALITY [12] and associations were considered significant with an FDR of 5%  
47 ( $q < 0.05$ ).

48

#### 49 **Supplementary references**

- 50 1. Hartmann M, Howes CG, Abarenkov K, Mohn WW, Nilsson RH, V-Xtractor: an  
51 open-source, high-throughput software tool to identify and extract hypervariable  
52 regions of small subunit (16S/18S) ribosomal RNA gene sequences. *J Microbiol*  
53 *Methods* 2010;83: 250-3.
- 54 2. DeSantis TZ, Hugenholtz P, Larsen N, Rojas M, Brodie EL, Keller K, Huber T,  
55 Dalevi D, Hu P, Andersen GL, Greengenes, a chimera-checked 16S rRNA gene  
56 database and workbench compatible with ARB. *Appl Environ Microbiol* 2006;72:  
57 5069-72.
- 58 3. Hao X, Jiang R, Chen T, Clustering 16S rRNA for OTU prediction: a method of  
59 unsupervised Bayesian clustering. *Bioinformatics* 2011;27: 611-8.
- 60 4. Bray JR, Curtis JT, An Ordination of the Upland Forest Communities of Southern  
61 Wisconsin. *Ecological Monographs* 1957;27: 326-49.
- 62 5. Gower JC, Some Distance Properties of Latent Root and Vector Methods Used in  
63 Multivariate Analysis. *Biometrika* 1966;53: 325-&.
- 64 6. Anderson MJ, Permutation tests for univariate or multivariate analysis of variance  
65 and regression. *Canadian Journal of Fisheries and Aquatic Sciences* 2001;58: 626-  
66 39.
- 67 7. Simpson EH, Measurement of Diversity. *Nature* 1949;163: 688-88.

- 68 8. De Caceres M, Legendre P, Associations between species and groups of sites:  
69 indices and statistical inference. *Ecology* 2009;90: 3566-74.
- 70 9. De Caceres M, Legendre P, Moretti M, Improving indicator species analysis by  
71 combining groups of sites. *Oikos* 2010;119: 1674-84.
- 72 10. Bouxin G, Ginkgo, a multivariate analysis package. *Journal of Vegetation Science*  
73 2005;16: 355-59.
- 74 11. Benjamini Y, Hochberg Y, Controlling the False Discovery Rate - a Practical and  
75 Powerful Approach to Multiple Testing. *Journal of the Royal Statistical Society*  
76 *Series B-Methodological* 1995;57: 289-300.
- 77 12. Kall L, Storey JD, Noble WS,  $q$ -value: non-parametric estimation of  $q$ -  
78 values and posterior error probabilities. *Bioinformatics* 2009;25: 964-66.

79

## 80 **Supplementary Figure Legends**

81 **Fig S1.** Adult antibiotic treatment has no effect on allergic asthma. **(A)** Eosinophil  
82 numbers in the bronchoalveolar lavage (BAL) fluid of control or antibiotic-treated mice  
83 challenged with ovalbumin (OVA) or PBS. **(B)** Serum OVA-specific IgE responses  
84 measured by ELISA. **(C)** Total pathological scores and representative H&E stained lung  
85 sections. Scale bar, 300 $\mu$ m. All assessments were made on day 26. The data are shown as  
86 means of 5-7 mice per group $\pm$ SEM and represent two independent experiments. Statistics  
87 shown are based on comparisons to OVA-challenged controls. The antibiotic-treated  
88 animals were treated with antibiotics at 7 weeks of age. Vanco, vancomycin; Strep,  
89 streptomycin; n.s.= not significant, n.d.= none detected.

90

91 **Fig S2.** Antibiotic treatment alone has no effect on lung histopathology. Total  
92 pathological scores and representative H&E stained lung sections. Scale bar, 300µm. All  
93 assessments were made on day 26. The data are shown as means of 4 mice per  
94 group±SEM and represent two independent experiments. Statistics shown are based on  
95 comparisons to PBS-treated controls. The antibiotic-treated animals were treated using  
96 the neonatal antibiotic regime. Vanco, vancomycin; Strep, streptomycin.

97

98 **Fig S3.** Intestinal communities shift differently after neonatal and adult antibiotic  
99 treatments. Bacterial communities from feces of OVA-challenged mice treated with  
100 antibiotics neonatally or only as adult were compared using principal coordinate analysis  
101 (PCO). Corresponding OVA-challenged controls for each experiment are also shown.  
102 Vanco, vancomycin; Strep, streptomycin.

103

#### 104 **Supplementary Data Sets**

105 **Data Set S1.** Representative sequences from OTUs that were classified within a  
106 Greengenes OTU identified in Table 1. Sequences that could not be matched to a  
107 Greengenes OTU (gg\_OTU) and thus remain “unclassified” in Table 1 have been listed  
108 under the headings corresponding to the closest-related taxon identified.

109

110 > Adlercreutzia ggOTU 916\_OTU089  
111 ACGAACGCTGGCGGCGTGCTTAACACATGCAAGTCGAACGGAGCACCCCTGA  
112 AAGAGTTTTTCGGACAATGGAAGGGAATGCTTAGTGGCGGACTGGTGAGTAAC  
113 GCGTGAGGAACCTGCCTTCCAGAGGGGACAACAGTTGGAAACGACTGCTAA  
114 TACCGCATGATGTGTTTCGATGGCATCATCGAGACACCAAAGATTTATCGCTG  
115 GAAGATGGCCTCGCGTCTGATTAGCTGGTAGGCGGGGTAACGGCCCACCTAG  
116 GCGACGATCAGTAGCCG  
117 > Adlercreutzia ggOTU 916\_OTU105

118 ATGAACGCTGGCGGCGTGCTTAACGCATGCAAGTCGAACGATTAACCCACCT  
119 TCGGGTGGTCATAGAGTGGCGAACGGGTGAGTAACACGTGACCAACCTGCCT  
120 CATGCATCGGGATAACTGCTGGAAACGGCAGCTAATACCGGATACTCTTGCA  
121 ACTTCGCATGGAGATGCAAGGAAAGCTTTCGCGGCATGAGATGGGGTCGCGG  
122 CCCATTAGGTAGACGGTGAGGTAGTGGCTCACCGTGCCTGCGATGGGTAGCC  
123 G  
124 > Adlercreutzia ggOTU 916\_OTU135  
125 ATGAACGCTGGCGGCGTGCTTAACACATGCAAGTCGAACGGGGTACCCTTGA  
126 AGGAGGCTTCGGCCAACAGATAGGAATACCTAGTGGCGGACGGGTGAGTAA  
127 CGCGTGAGGAACCTGCCTTGGAGTGGGGAATAACAGTTAGAAATAGCTGCTA  
128 ATACCGCATAATGCAGTTGGGTGCGATGACTCTGACTGCCAAAGATTTATCGC  
129 TCTGAGATGGCCTCGCGTCTGATTAGATAGTTGGCGGGGTAAACGGCCCACCA  
130 AGTCGACGATCAGTAGCCG  
131 > Adlercreutzia ggOTU 916\_OTU148  
132 ATGAACGCTGGCGGCGTGCCCTAACACATGCAAGTCGAACGGACAGAGCCTGA  
133 AACCTAGTGAAGGCGAAGTTAGTGGCGGACGGGTGAGTAACGCGTGGATAA  
134 CCTGCCGTGTACCGGGGATAACACTTAGAAATAGGTGCTAATACCGCATAA  
135 GCGCACAAGGACCGCATGGTCCGGTGTAGAAAACTCAGGTGGTACATGATG  
136 GACTCCGCGTCCGATTAGCTAGTTGGCGGGATAGGAGCCACCAAGGCGACG  
137 ATCGGTAGCCG  
138 > Adlercreutzia ggOTU 916\_OTU266  
139 ATGAACGCTGGCGGCGTGCCCTAACACATGCAAGTCGAACGGTAAAGCCGGCT  
140 TCGGCCGGGAATACAGTGGCGAACGGGTGAGTAACACGTGACCAACCTGCC  
141 CCCGCTCCGGGACAACCGCTGGAAACGGCGGCTAATACCGGGTACTCCGCGG  
142 GCCCGCATGGGGCCGGCGGGAAAGCCAGGCGGGGGATGGGGTTCGCG  
143 GCCATTAGGTAGTAGGCGGGGTAGAGGCCACCTAGCCGACGATGGGTAGC  
144 CG  
145  
146 >Alistipes ggOTU 1053\_OTU036  
147 ATGAACGCTAGCGGCAGGCTTAACACATGCAAGTCGGAGGGGCAGCGAGAT  
148 CAGTGCTTGCATGATTGTCGGCGACCGGCGCACGGGTGCGTAACGCGTATG  
149 CAACCTACCCATTACAGGGGGATAACACTGAGAAATCGGTACTAATACCCCA  
150 TAACATCCAGGGAGGCATCTTCTTGGGTTGAAACTCCGGTGGTAATGGATG  
151 GGCATGCGTTGTATTAGTTAGTTGGTGGGGTAACGGCTCACCAAGACGACGA  
152 TACATAGGGG  
153 > Alistipes ggOTU 1053\_OTU054  
154 ATGAACGCTGGCGGCGTGCTTAACACATGCAAGTCGAACGAGAATCAGTGGA  
155 ACAAGGATTCGTCTGAGGGAAGCTGAGGAAAGTGGCGGACGGGTGAGTAA  
156 GCGTGAGCAATCTGCCTTGGAGTGGGGAATAACGGCTGGAAACAGCCGCTAA  
157 TACCGCATGATGCATCTGAGTCGCATGGTTTGGATGCCAAAGATTTATCGCTC  
158 TGAGATGAGCTCGCGTCTGATTAGCTAGTTGGCGGGGTAAATGGCCCACCAAG  
159 GCGACGATCAGTAGCCG  
160 > Alistipes ggOTU 1053\_OTU080  
161 ACGAACGCTGGCGGCGTGCCCTAACACATGCAAGTCGAACGGAGTTACGATGA  
162 AACCTAGTGATTTCGTAACCTAGTGGCGGACGGGTGAGTAACGCGTGGATAAC  
163 CTGCCTTGCATGGGGGATAACACTTAGAAATAGGTGCTAATACCGCATAAG

164 CGCACAGAGCCGCATGGCTCAGTGTGAAAACTCCGGTGGTGTAAAGATGGAT  
165 CCGCGTCTGATTAGCTGGTTGGCGGGGTAGAAGCCCACCAAGGCGACGATCA  
166 GTAGCCG  
167 > Alistipes ggOTU 1053\_OTU412  
168 ATAAACGCTGGCGGCGCACATAAGACATGCAAGTCGAACGGACTTAACCATT  
169 AGTTTACTATTGGAGCGGTTAGTGGCGGACTGGTGAGTAACACGTAAGCAAC  
170 CTGCCTATCAGAGGGGAACAACAGTTAGAAATGACTGCTAATACCGCATATG  
171 CCATAAACATCGCATGATGTTAGTGGGAAAGAAGCAATTCGCTGATAGATGA  
172 GCTTGGCGGCTGATTAGCTAGTTGGTGGGGTAAAGGCCTACCAAGGCGACGAT  
173 CAGTAGCCG  
174 >Unclassified Bacteroidales ggOTU 991\_OTU004  
175 ATGAACGCTAGCGACAGGCCTAACACATGCAAGTCGAGGGGCATCGGGGCG  
176 AGGAGCAATCCTTGCCGCCGGCGACCGGCGCACGGGTGAGTAACGCGTATGC  
177 GACCTGCCCCGTTGCAGGGGGATAATCGGGAGAAATCCCGTCTAATACCGCGT  
178 AATGCCGCGGGGCTGCATGGCCCTGCGGCCAAAGGGAGCGATTCCGGCAACG  
179 GATGGGCATGCGTGACATTAGCTAGTTGGCGGGGCAACGGCCCA  
180 > Unclassified Bacteroidales ggOTU 991\_OTU005  
181 ATGAACGCTAGCGGCAGGCTCAACACATGCAAGTCGAGGGGCATCGGGAGG  
182 GAAGCTTGCTTTCCTTGCCGGCGACCGGCGCACGGGTGAGTAACACGTATGC  
183 AACCTGCCCTTTCAGGGGGACAACCTTCCGAAAGGGAGGCTAATCCCGCGT  
184 ATATCGGTTTTCGGGCATCCGAGATCGAGGAAAGATTCATCGGAAGAGGATGG  
185 GCATGCGGCGCATTAGCTTGACGGCGGGGTAACGGCCCACCGTGGCGACGAT  
186 GCGTAGGGG  
187 > Unclassified Bacteroidales ggOTU 991\_OTU008  
188 ATGAACGCTAGCGACAGGCTTAACACATGCAAGTCGAGGGGCAGCGGGGAG  
189 GTAGCAATACTTCCGCCGGCGACCGGCGCACGGGTGAGTAACACGTATGGAA  
190 CCTGCCCGTAGCAGGGGGATAAACGGAAGAAATTCCGTCTAATACCGCGTAA  
191 TAACTCCGAGAGGCATCTCATGGAGTTTAAAGGGTAACACCGGCTACGGATG  
192 GCCATGCGGCGCATTAGCTAGTTGGCGGGGTAAC  
193 > Unclassified Bacteroidales ggOTU 991\_OTU011  
194 ATGAACGCTAGCGACAGGCTTAACACATGCAAGTCGAGGGGCAGCGGGGCG  
195 AGTGCTTGCACTCGCTGCCGGCGACCGGCGCACGGGTGAGTAACACGTATGG  
196 AACCTGCCCGCAGCAGGGGGATAAGCGGAAGAAATTCCGTCTAATACCGCGT  
197 AACAACCGTCGGAGGCATCTCCGGTGGTTTAAAGGTTTACCGGCTGCGGATG  
198 GCCATGCGGCGCATTAGCTAGTTGGCGGGGTAAC  
199 > Unclassified Bacteroidales ggOTU 991\_OTU014  
200 ATGAACGCTAGCGACAGGCTTAACACATGCAAGTCGAGGGGCAGCGGGGCG  
201 GGAAGCTTGCTTTCGCCCGCCGGCGACCGGCGCACGGGTGAGTAACACGTAT  
202 GCAACCTGGCCGCCACAGGGGGATAACCCGCGGAAACGCGGCCTAATACCCC  
203 GTGACGCCACCGGAGGGCATCCTCCGGTGGCCAAAGGAGTGATCCGGTGGCG  
204 GATGGGCATGCGGCGCATTAGCTAGACGGCGGGGTGACGGCCCACCGTGGCG  
205 ACGATGCGTAGGGG  
206 > Unclassified Bacteroidales ggOTU 991\_OTU019  
207 ATGAACGCTAGCGACAGGCTTAAACACATGCAAGTCGAGGGGCAGCGGTGG  
208 TGAAGGCTTGCTTACCAGCCGGCGACCGGCGCACGGGTGAGTAACACGTA  
209 TGCAACCTGCCTGCCACAGCCGGATAATCGGGAGAAATTCGTCTAATACGG

210 CATAATGCATCGACGGGACATCCTGTTGGTGCCAAAGGTTAATTCCGGTGGC  
 211 GGATGGGCATGCGTCGCATTAGTTAGTTGGCGGTGTAACGGACCACCAAGAC  
 212 GACGATGCGTAGGGG  
 213 > Unclassified Bacteroidales ggOTU 991\_OTU024  
 214 ATGAACGCTAGCGGCAGGCTTAACACATGCAAGTCGAAGGGCATCGCGGGG  
 215 AGTGCTTGCACTCCCTGGCGGCGACTGGCGCACGGGTGAGTAACACGTATGC  
 216 AACCTGCCCTCCACAGGGGGACAACCTTCCGAAAGGGAGGCTAATCCCGCGT  
 217 AAATCTCGATGGGGCATCCCATTGAGAGGAAAGCTTCGGCGGTGGAGGATGG  
 218 GCATGCGGCGCATTAGCTAGTCGGCGGGGTAACGGCCCA  
 219 > Unclassified Bacteroidales ggOTU 991\_OTU029  
 220 ATGAACGCTAGCGACAGGCTTAACACATGCAAGTCGAGGGGCAGCGGGGGG  
 221 CGAAGCTTGCTTCGCTGCCGGCGACCGGGCGCACGGGTGAGTAACACGTATG  
 222 CGACCTGCCCCCGCAGGGGGATAACCGGGAGAAATCCCGACTAATACCGCG  
 223 TAACGCCGCTGGGCTGCATGGCCCGCGGCCAAAGGAAGCGATTCCGGCGGG  
 224 GGATGGGCATGCGGCGCATTAGCTAGTCGGCGGGGTAACGGCCCACCGAGGC  
 225 GACGATGCGTAGGGG  
 226 > Unclassified Bacteroidales ggOTU 991\_OTU042  
 227 ATGAACGCTAGCGACAGGCTTAACACATGCAAGTCGAGGGGCAGCGGGGCGG  
 228 CAGGCTTGCTGCCGTTGCCGGCGACCGGGCGCACGGGTGAGTAACACGTATG  
 229 CAACCTGCCCCGTGGCAGGGGGATAAGCGGGGGAAACCCCGTCTAATACCGCG  
 230 TAACGCGGCCTAGGGACATCCCAAGGCCGCCAAAGGGAGCAATCCCGGCCA  
 231 CGGATGGGCATGCGGCGCATTAGCTAGTCGGCGGGGTAACGGCCCACCGAGG  
 232 CGACGATGCGTAGGGG  
 233 > Unclassified Bacteroidales ggOTU 991\_OTU045  
 234 ATGAACGCTAGCGACGGGCTTAACACATGCAAGTCGAGGGGCAGCGGGTAG  
 235 ATGAGCTTGCTCATTTATGCCGGCGACCGGGCGCACGGGTGAGTAACACGTAT  
 236 GCAACCTGCCCCGTCTCAGGGGGATAATCGTCGGAAACGGCGTCTAATACCC  
 237 GTATGAAGCTGGACGGCATCGTCTGGTTTTGAAAGAATATCGGAGACGGATG  
 238 GGCATGCGGCGCATTAGCTGGTTGGCGGGGTAACGGCCCACCAAGGCAACGA  
 239 TCGTAGGGG  
 240 > Unclassified Bacteroidales ggOTU 991\_OTU051  
 241 ATGAACGCTAGCGACAGGCTTAACACATGCAAGTCGAGGGGCAGCGGGGGT  
 242 GATGGCTTGCCATCGCCTGCCGGCGACCGGGCGCACGGGTGAGTAACACGTAT  
 243 GCAACCTGCCCCGCCACAGGGGGATAAGCGGAAGAAATTCGCTCTAATACCGC  
 244 GTGACGCGGCGTCGGGGCATCCCGGTGCCGCCAAAGGGATTACCGGTGGCGG  
 245 ATGGGCATGCGGCGCATTAGCTAGTCGGCGGGGTAACGGCCCACCGAGACGA  
 246 CGATGCGTAGGGG  
 247 > Unclassified Bacteroidales ggOTU 991\_OTU063  
 248 ATGAACGCTAGCGACAGGCTTAACACATGCAAGTCGAGGGGCAGCGGGGCA  
 249 GGAAGCTTGCTTTCTGCCGCCGGCGACCGGGCGCACGGGTGAGTAACACGTAT  
 250 GCAACCTGGCCGTGACAGATGGATAACCGGGAGAAATCCCGCCTAATACAGC  
 251 ATGACGCCGGGAAGGGACATCCCTTCCGGCCAAAAGGGGGCACTCCGGTCA  
 252 CGGATGGGCATGCGGCGCATTAGGTAGTTGGTGGGGCAACGGCCCACCAAGC  
 253 CGACGATGCGTA  
 254 > Unclassified Bacteroidales ggOTU 991\_OTU066  
 255 ATGAACGCTAGCGACAGGCTTAACACATGCAAGTCGAAGGGGCAGCGGGGG



256 ATGCGTTCGCGCATTCTGCCGGCGACCGGGCGCACGGGTGAGTAACACGTATG  
257 CAACCTGCCCCGTCCAGGGGGATAATCGGGCGGAAACGCCGTCTAATACCGCG  
258 TATATCGGTACCGGGCATCCGGGATTGAAGAAAGGGCCTTAGGGTCCGGGAC  
259 GGGATGGGCATGCGGGCGCATTAGGAAGTTGGCGGTGTAACGGACCACCAATC  
260 CGTCGATGCGTAGGGG  
261 > Unclassified Bacteroidales ggOTU 991\_OTU083  
262 ATGAACGCTGGCGGGCGTGCTTAACACATGCAAGTCGAACGAAGCGATCAGGA  
263 GGAAATTTTCGGATGGAATCCGGATTGACTGAGTGGCGGACGGGTGAGTAAC  
264 GCGTGGGTAACCTGCCTCATAACAGGGGGATAACAGTTAGAAATGACTGCTAA  
265 TACCGCATAAGCGCACGGGGATGCATATTCTTGTGTGAAAACTCCGGTGGT  
266 ATGAGATGGACCCGCGTCTGATTAGCTAGTTGGTGAGGTAACGGCTCACCAA  
267 GGCGACGATCAGTAGCCG  
268 > Unclassified Bacteroidales ggOTU 991\_OTU254  
269 ATGAACGCTGGCGGGCGTGCTTAACACATGCAAGTCGAACGAAGCACTTGCAG  
270 CAGACTGGAGAGCTTGCTCAAAGGGAAGCAGCATTGACTGAGTGGCGGACG  
271 GGTGAGTAACGCGTGGATAACCTGCCTCATAACAGGGGGATAACAGTTGAAA  
272 CGGCTGGTTAATACCGCATAAGCGCACGAAACCGCATGGTTTTGTGTGAAAA  
273 ACTCCGGTGGTATGAGATGGGGTCCGCGTCTGATTAGCTAGTTGGCAGGGTA  
274 ACGGCCTACCAAGGCGACGATCAGTAGCCG  
275 > Unclassified Bacteroidales ggOTU 991\_OTU333  
276 TTGAACGCTGGCGGCATGCCTTACACATGCAAGTCGAACGGTAACAGGTCTT  
277 TCGGGATGCTGACGAGTGGCGAACGGGTGAGTAATACATCGGAACGTGCCCG  
278 AGAGTGGGGGATAACGAGGCGAAAGCTTTGCTAATACCGCATAACGATCTCAG  
279 GATGAAAGCAGGGGACCTTCGGGCCTTGCCTCACGGAGCGGCCGATGGCAG  
280 ATTAGGTAGTTGGTGGGATAAGAGCTTACCAAGCCTGCGATCTGTAGCTG  
281 > Unclassified Bacteroidales ggOTU 991\_OTU339  
282 TTGAACGCTGGCGGCAGGCCTAACACATGCAAGTCGAGCGGCAGCACAAAGG  
283 GAGTTTACTCCTGAGGTGGCGAGCGGCGGACGGGTGAGTAATGCCTAGGGAT  
284 CTGCCAGTCGAGGGGGATAACAGTTGGAAACGACTGCTAATACCGCATAACG  
285 CCCTACGGGGGAAAGAGGGGGACCTTCGGGCCTCTCGCGATTGGATGAACCT  
286 AGGTGGGATTAGCTAGTTGGTGAGGTAATGGCTCACCAAGGCGACGATCCCT  
287 AGCTG  
288 > Unclassified Bacteroidales ggOTU 991\_OTU342  
289 ATGAACGCTGGCGGGCGTGCTTAACACATGCAAGTCGAACGGGGTATATAAGC  
290 GGAAGTTTACGGATGGAAGGTTATATACTTAGCGGCGGACGGGTGAGTAACG  
291 CGTGGACAACCTGCCCTATGCAGGGGGATAACATCCGGAAACGGGTGCTAAT  
292 ACCGCATAAGCGCACAGTACCGCATGGTACGGTGTGAAAAGCTGAGGCGGC  
293 ATAGGATGGGTCCGCGTTGGATTAGGCAGTTGGCGGGGTAACGGCCCACCAA  
294 ACCGACGATCCATAGCCG  
295 > Unclassified Bacteroidales ggOTU 991\_OTU384  
296 ATGAACGCTGGCGGGCGTGCTTAACACATGCAAGTCGAACGAGAATCCAGTGA  
297 AGGAGTTTTTCGGACAACGGATCTGGAGGAAAGTGGCGGACGGGTGAGTAAC  
298 GCGTGAGCAATCTGCCTTGGAGTGGGGAATAACGGTTGGAAACAGCCGCTAA  
299 TACCGCATGATGCGTCTGGGAGGCATCTCTCTGGACGCCAAAGATTTATCGCT  
300 CTGAGATGAGCTCGCGTCTGATTAGCTTGTGGCGGGGTAAAGGCCACCAA  
301 GGCGACGATCAGTAGCCG

302 > Unclassified Bacteroidales ggOTU 991\_OTU385  
303 ATGAACGCTGGCGGCGTGCCTAACACATGCAAGTCGAACGAAGCATAAGGA  
304 GCGGAAGTTTTTCGGATGGAAGCAACTTATGACTGAGTGGCGGACGGGTGAGT  
305 AACGCGTGGGTAACCTGCCCCACACAGGGGGACAACAGCTGGAAACGGCTG  
306 CTAATACCGCATAAGCGCACAAAGGGCTGCATGGCCTGGTGTGAAAAGCTGAG  
307 GCGGTGTGGGATGGACCCGCGTCCGATTAGGTAGTTGGCAGGGTAGAGGCCT  
308 ACCAAGCCTGCGATCGGTAGCCG  
309 > Unclassified Bacteroidales ggOTU 991\_OTU389  
310 ATGAACGCTAGCGACAGGCCTAACACATGCAAGTCGGAGGGGCATCGGGGC  
311 GAGGAGCAATCCTTGCCGCCGCGACCGGCGCACGGGTGAGTAACACGTATG  
312 CAACCTGCCCTCCACAGGGGGACAACCTTCCGAAAGGAGGCTAATCCGCGTA  
313 AATCTCGATGGGGCATCCCATTGAGACGGAAAGCTTCGGCGGTGGAGGATGG  
314 GCATGCGGCGCATTAGCTAGTCGGCGGGGTAACGG  
315 > Unclassified Bacteroidales ggOTU 991\_OTU411  
316 ATAAACGCTGGCGGCGCACATAAGACATGCAAGTCGAACGAACCTTAATTTAA  
317 ATGTTTACATTTAGAAGCGGTTAGTGGCGGACTGGTGTAGTAACACGTAAAGCA  
318 ACCTGCCTGTTAGAGGGGAATAACAATGAGAAATCATTGCTAATACCGCATA  
319 TACTATAAGTACTGCATGGTACAAATAGGAAAGGAGAAATCCGCTAACAGAT  
320 GGGCTTGCGTCTGATTAGATAGTTGGTGGGGTAAAGGCCTACCAAGTCGACG  
321 ATCAGTAGCCG  
322 > Unclassified Bacteroidales ggOTU 991\_OTU414  
323 ATGAACGCTAGCGACAGGCTTAACACATGCAAGTCGAGGGGGCAGCGGGGAG  
324 GTAGCAATACTTCCGCCGCGACCGGCGCACGGGTGAGTAACACGTATGGAA  
325 CCTGCCCGTAGCAGGGGGATAAGCGGAAGAAATTCGCGCTAATACAGCATGA  
326 CGCCGGAAGGGACATCCCTTTCGGCCAAAGGGGGCGACTCCGGTCACGGA  
327 TGGGCATGCGGCGCATTAGGTAGTTGGTGGGGCAACGGCCCACCAAGCCGAC  
328 GATGCGTAGGGG  
329 > Unclassified Bacteroidales ggOTU 991\_OTU463  
330 ATGAACGCTGGCGGCGTGTCTTAACACATGCAAGTCGAACGGAAGATATACGG  
331 CGACGAGATTTTCGGTCAAATCAAGTGTATCTTTAGTGGCGGACGGGTGAGTA  
332 ACGCGTGGGTAACCTGCCTCATAACAGGGGGATAACAGTTAGAAATGACTGCT  
333 AATACCGCATAAGCGCACAGGACCGCATGGTCCGGTGTGAAAACTCCGGTG  
334 GTACAGGATGGACCCGCGTCTGATTAGCTGGTTGGCGGGGTAACGGCCCACC  
335 AAGGCGACGATCAGTAGCCG  
336 > Unclassified Bacteroidales ggOTU 991\_OTU466  
337 ATGAACGCTGGCGGCGTGTCTTAACACATGCAAGTCGAACGGGGATTACACGG  
338 AGATGCGATTTTCGGTCAAATCAAGTGTAACTTTAGTGGCGGACGGGTGAGCA  
339 ACGCGTGGGTAACCTGCCTTGCCTGAGGGGGATAACACCTGGAAACAGGTGCT  
340 AATACCGCATAACAGGAAGAGGCGCATGCCACTTTCTTGAAAACTCCGGTGG  
341 TGTAAGATGGACCCGCGTCTGATTAGCTGGTTGGCGGGGTAACGGCCCACCA  
342 AGGCGACGATCAGTAGCCG  
343 > Unclassified Bacteroidales ggOTU 991\_OTU467  
344 ATGAACGCTGGCGGCGTGTCTTAACACATGCAAGTCGAGCGAAGCACTTCACT  
345 TTTATTCTTCGGATGCGAGGTGATTTGACTGAGCGGCGGACGGGTGAGTAAC  
346 GCGTGGGCAACCTGCCTCATAACAGGGGGATAACAGTTAGAAATGACTGCTAA  
347 TACCGCATAAGCGCACAGGACCGCATGGTCCGGTGTGAAAACTCCGGTGGT

348 ACAGGATGGACCCGCGTCTGATTAGGTAGTTGGCGGGGTAACGGCCCACCAA  
349 GCCGACGATCAGTAGCCG  
350 > Unclassified Bacteroidales ggOTU 991\_OTU470  
351 ACGAACGCTGGCGGCGCGCCTAACACATGCAAGTCGAACGGAGCTTATATTT  
352 CAGAAGTTTTTCGGATGGACGAGAGATAAGCTTAGTGGCGGACGGGTGAGTAA  
353 CACGTGAGCAACCTGCCTTTCAGAGGGGGATAACAGTTGGAAACATCTGCTA  
354 ATACCGCATGATGCAGTTGGGCCACATGGCTCTGACTGCCAAAGATTTATCG  
355 CTCTGAGATGGGCTCGCGTCTGATTAGCTAGTTGGCGGGGCAACGGCCCACC  
356 AAGGCGACGATCAGTAGCCG  
357 > Unclassified Bacteroidales ggOTU 991\_OTU475  
358 ATGAACGCTGGCGGCGTGCTTAACACATGCAAGTCGAACGGACTCATATTGA  
359 AACCTAGTGATGTATGAGTTAGTGGCGGACGGGTGAGTAACGCGTGGGTAAC  
360 CTGCCTTGCCTGGGGGATAACACTTAGAAATAGGTGCTAATACCGCATAAC  
361 AGTAGGAGACGCATGTCTTTTACTTGAAAACCTCCGGTGGTGTAAGATGGACC  
362 CGCGTCTGATTAGCTTGTGCGGGGTAACGGCCCACCAAGGCAACGATCAGT  
363 AGCCG  
364 > Unclassified Bacteroidales ggOTU 991\_OTU476  
365 ACGAACGCTGGCGGCAGGCCTAACACATGCAAGTCGAGCGGACCCTTCGGGG  
366 TTAGCGGCGGACGGGTGAGTAACGCGTGGGAACGTGCCCTTTGCTTCGGAAT  
367 AGCCCTGGGAAACTGGGAGTAATACCGGATACGCCCTTTTGGGGAAAGATTT  
368 ATCGGCGAAGGATCGGCCCGCGTTGGATTAGGTAGTTGGTGGGGTAATGGCC  
369 TACCAAGCCGACGATCCATAGCTG  
370 > Unclassified Bacteroidales ggOTU 991\_OTU478  
371 ATGAACGCTGGCGGCGTGCTTAACACATGCAAGTCGAACGAAGCATTTTAAA  
372 ATGAGACTTTCGGGTGGATTTTAAAATTGACTGAGTGGCGGACGGGTGAGTA  
373 ACGCGTGGGCAACCTGCCTTACACAGGGGGACAACAGTTAGAAATGACTGCT  
374 AATACCGCATAAGCGCACAGGATCGCATGGTCCGGTGTGAAAAACTCCGGTG  
375 GTATACGATGGACCCGCGTCTGATTAGCTTGTGGCGGGGTAACGGCCCACC  
376 AAGGCGACGATCAGTAGCCG  
377  
378 >Unclassified Lachnospiraceae ggOTU 2087\_OTU010  
379 ATGAACGCTGGCGGCGTGCTTAACACATGCAAGTCGAACGGACTCATATTGA  
380 AACCTAGTGATTTATGAGTTAGTGGCGGACGGGTGAGTAACGCGTGGATAAC  
381 CTGCCGTATAACGGGGGATAACACTTAGAAATAGGTGCTAATACCGCATAAG  
382 CGCACGGCTCCGCATGGGGCAGTGTGAAAAACTCCGGTGGTATACGATGGAT  
383 CCGCGTCTGATTAGCTAGTTGGCGGGGTAACGGCCA  
384 > Unclassified Lachnospiraceae ggOTU 2087\_OTU020  
385 ATGAACGCTGGCGGCGTGCTTAACACATGCAAGTCGAACGGACTCATATTGA  
386 AACCTAGTGATATATGAGTTAGTGGCGGACGGGTGAGTAACGCGTGGAGAAC  
387 CTGCCGTATACTGGGGGATAACACTTAGAAATAGGTGCTAATACCGCATAAG  
388 CGCACAGCTTCGCATGAAGCAGTGTGAAAAACTCCGGTGGTATACGATGGAT  
389 CCGCGTCTGATTAGCTGGTTGGCGGGGTAAGGCCACCAAGGCGACGATCA  
390 GTAGCCG  
391 > Unclassified Lachnospiraceae ggOTU 2087\_OTU022  
392 ATGAACGCTGGCGGCGTGCTTAACACATGCAAGTCGAACGGACAGGTAATGA  
393 AACCTAGTGATTTATCTGTTAGTAGCGGACGGGTGAGTAACGCGTGGGTAAC

394 CTGCCGTATACAGGGGGATAAACACTTAGAAAATAGGTGCTAAAACCGCATAAG  
395 CGCACAGGATCGCATGGTCTGGTGTGAAAAACTCCGGTGGTATACGATGGAC  
396 CCGCGTCTGATTAGCTTGTGGCGGGGTAGAGGCCACCAAGGCGACGATCA  
397 GTAGCCG  
398 > Unclassified Lachnospiraceae ggOTU 2087\_OTU025  
399 ATGAACGCTGGCGGCGTGCTAACACATGCAAGTCGAACGGGGCGCGCAGG  
400 CTGAGGCTTTTCGGAGCGGAAGCCTGCGCTGCCAGTGGCGGACGGGTGAGT  
401 AACGCGTGGGCAACCTGCCCTGCACTGGGGGACAACAGCCGGAAACGGCTG  
402 CTAATACCGCATATGCCCGCAGCCCCGCATGGGGCGGCGGGGGAAAGCTCCGG  
403 CGGTGCAGGATGGGCCCGCGTCTGATTAGCTGGTTGGCGGGGCAACGGCCCA  
404 CCAAGGCGACGATCAGTAGCCG  
405 > Unclassified Lachnospiraceae ggOTU 2087\_OTU026  
406 ATGAACGCTGGCGGCGTGCTAACACATGCAAGTCGAACGGAGATTATACGC  
407 AGAGGCGATTTTCGGTCAAATCATGTGTAATCTTAGTGGCGGACGGGTGAGTA  
408 ACGCGTGGGTAACCTGCCTTACACTGGGGGATAAACACTTAGAAAATAGGTGCT  
409 AATACCGCATAAGCGCACGAAGCCGCATGGATTTGTGTGAAAAACTCCGGTG  
410 GTGTAAGATGGACCCGCGTCTGATTAGCTTGTGGCGGGGTAACGGCCACC  
411 AAGGCGACGATCAGTAGCCG  
412 > Unclassified Lachnospiraceae ggOTU 2087\_OTU039  
413 ATGAATGCTGGCGGCGTGCTTAACACATGCAAGTCGAACGGACCCATATTGA  
414 AACCTAGTGATATATGGGTTAGTGGCGGACGGGTGAGTAACGCGTGGGTAAC  
415 CTGCCTTACACAGGGGGATAAACACTTAGAAAATAGGTGCTAAAACCGCATAAG  
416 CGCACAGCTTCGCATGAAGCGGTGTGAAAAACTCCGGTGGTGTAAGATGGAC  
417 CCGCGTCTGATTAGCTTGTGGCGGGGTAACGGCCACCAAGGCGACGATCA  
418 GTAGCCG  
419 > Unclassified Lachnospiraceae ggOTU 2087\_OTU047  
420 ATGAACGCTGGCGGCGTGCTTAATACATGCGAAGTCGAACGAAGCACCTCTC  
421 CCGTTGATTGACCTAGCTTGCTAGAGATTGAAACAATTGAGGTGACTGAGTG  
422 GCGGACGGGTGAGTAACGCGTGGGTAACCTGCCTTGTACAGGGGGATAAACAG  
423 TTGAAACGACTGCTAATACCGCATAAGCGCACAGTATCGCATGATACAGTG  
424 TGAAAAACTCCGGTGGTACAAGATGGACCCGCGTCTGATTAGCTAGTTGGAG  
425 GGGTAACGGCCACCAAGGCAACGATACAGTAGCCG  
426 > Unclassified Lachnospiraceae ggOTU 2087\_OTU049  
427 ACGAACGCTGGCGGCGTGCTTAACACATGCAAGTCGAACGGGGATGCCATTT  
428 TTGAAGCGATTAGCTTGCTGAGAGTGGAAATGTTGGCATCTTAGTGGCGGAC  
429 GGGTGAGTAACGCGTGGGGAACCTGCCCTGTACAGGGGGATAAACACTTAGAA  
430 ATAGGTGCTAATACCGCATAAGCGCACAGTATCGCATGATACAGTGTGAAAA  
431 ACTCCGGTGGTACAGGATGGACCCGCGTCTGATTAGCTGGTTGGCGGGGTAA  
432 CGGCCACCAAGGCGACGATCAGTAGCCG  
433 > Unclassified Lachnospiraceae ggOTU 2087\_OTU058  
434 ATGAACGCTGGCGGCGTGCTTAGCACATGCAAGTCGAACGAAGCGGTTACAG  
435 GGATCCCTTCGGGGAGGAACGGTAACCTGTCTGAGTGGCGGACGGGTGAGTA  
436 ACGCGTGGGCAACCTGCCCATACCGGGGGATAACAGCCGGAAACGGCTGCT  
437 AATACCGCATAACGCCAGGAGGCTGCATAGCTTCTGGGGAAAACTCCGGTG  
438 GTATGGGATGGGCCCGCGTCTGATTAGCTCGTTGGCGGGGTAACGGCCACC  
439 AAGGCGACGATCAGTAGCCG

440 > Unclassified Lachnospiraceae ggOTU 2087\_OTU059  
441 ATGAACGCTGGCGGCGTGCTTAACACATGCAAGTCGAACGGAGACGGACCTG  
442 GAAGTAACAGTTTACTGTAACGGAAAGATCTGTCTTAGTGCGGACGGGTGA  
443 GTAACGCGTGGGCAACCTGCCCTGTACCGGGGGATAACACTTAGAAATAGGT  
444 GCTAATACCGCATAATAAGGAAGACCGCATGGTGGTCCTTTGAAAACCTCCGG  
445 TGGTACAGGATGGGCCCGCGTCTGATTAGCCAGTTGGCGGGGTAACGGCCCA  
446 CCAAAGCGACGATCAGCAGCCG  
447 > Unclassified Lachnospiraceae ggOTU 2087\_OTU062  
448 ATGAACGCTGGCGGCGTGCTTAACACATGCAAGTCGAAACGGGTGTACAGAA  
449 GGGAAGATTACGGTCGGAAGATCTGTGCATGAGTGGCGGACGGGTGAGTAA  
450 CGCGTGGGCAACCTGGCCTGTACAGGGGGATAACACTTAGAAATAGGTGCTA  
451 ATACCGCATAACGGGGGAAGCCGCATGGCTTTTTCCTGAAAACCTCCGGTGGT  
452 ACAGGATGGGCCCGCGTCTGATTAGCCAGTTGGCAGGGTAACGGCCTACCAA  
453 AGCGACGATCAGTAGCCG  
454 > Unclassified Lachnospiraceae ggOTU 2087\_OTU068  
455 GTGAACGCTGGCGGCGTGCTTAACACATGCAAGTCGAACGAAGCACGGGGGA  
456 CGGAAGCCCTCCGGGGTGGGAAGGCCGCGTGACTGAGTGGCGGACGGGTGAG  
457 TAACGCGTGGGTAACTGCCCCATACAGGGGGATAACAGCCGGAAACGGCTG  
458 CTAATACCGCATGCACATGCGGGGGCGCATGCCCTGGATGGAAAGCTTTCG  
459 CGGTATGGGATGGGCCCGCGTCTGATTAGCCAGTTGGCGGGGTAACGGCCCA  
460 CCAAACCGACGATCAGTAGCCG  
461 > Unclassified Lachnospiraceae ggOTU 2087\_OTU070  
462 ATGAACGCTGGCGGCGTGCTTAACACATGCAAGTCGAACGGGCGCGGCGTGC  
463 GGCAGGGGCCTCGGCCCTGCGGCGCCGCGCAGTGGCGGACGGGTGAGTA  
464 ACGCGTGGGCAACCTGCCCTGTACTGGGGGATAACACCTGGAAACAGGTGCT  
465 AATACCGCATAAGCGCGCTGTGCCGCATGGCGCGGCGCGGAAAACCCCGGTG  
466 GTACAGGATGGGCCCGCGTCTGATTAGCTGGTTGGCAGGGTAACGGCCTACC  
467 AAGGCGACGATCAGTAGCCG  
468 > Unclassified Lachnospiraceae ggOTU 2087\_OTU076  
469 ATGAACGCTGGCGGCACGCCTAACACATGCAAGTCGAACGGACGAGAGGAA  
470 GCTTGCTTCTCAAGTTAGTGGCGGACGGGTGAGTAACACGTGAGCAACCTG  
471 CCTCTGAGAGAGGGATAGCTTCTGGAAACGGATGGTAATACCTCATAACATA  
472 GTGAAATCGCATGATTTTGTATCAAAGAAATTCGCTCAGAGATGGGCTCGC  
473 GTCTGATTAGATAGTTGGTGAGGTAACGGCTCACCAAGTCGACGATCAGTAG  
474 CCG  
475 > Unclassified Lachnospiraceae ggOTU 2087\_OTU079  
476 ATGAACGCTGGCGGCGTGCTTAACACATGCAAGTCGGAACGGGGTATATAAG  
477 CGGAAGTTTACGGATGGAAGGTTATACTTAGTGGCGGACGGGTGAGTAAC  
478 GCGTGGGCAACCTGCCCGTGCCGGGGGATACCGCCTGGAAACAGGCGCTAA  
479 TACCGCATAAGCGCATAACAGCCGCATGGGTGTATGCGGAAAGCTCCGGCGGC  
480 ACGGGATGGGCCCGCGCCCGATTAGCCAGTTGGCGGGGTAACGGCCACCAA  
481 AGCGACGATCGGTAGCCG  
482 > Unclassified Lachnospiraceae ggOTU 2087\_OTU087  
483 ATGAACGCTGGCGGCGTGCTTAACACATGCAGGTCGAACGAAGCATGCAGG  
484 AAGAAGCCCTTCGGGGCGGGCGCCTGGATGACTGAGTGGCGGACGGGTGAG  
485 TAACGCGTGGGCAACCTGCCCCATACAGGGGGATAACAGCCGGAAACGGCT

486 GCTAATACCGCATAAACCAGGGAGGCGCATGCCTTTGTGGGGAAAGCTCCGG  
487 CGGTATGGGAGGGGCCCCGCGTCTGATTAGCTTGTGGCGGGGCAGCGGCCCA  
488 CCAAGGCGACGATCAGTAGCCG  
489 > Unclassified Lachnospiraceae ggOTU 2087\_OTU088  
490 ATGAACGCTGGCGGCGTGCCTAACACATGCAAGTCGAACGGGGGCGTGATGT  
491 GCGAGAGGGATAGTTTACTAGACTTCAAACCTTTTCACGCCCTAGTGGCGGAC  
492 GGGTGAGTAACGCGTGGGTAACCTGCCATATACAGGGGGATAAACTTAGAA  
493 ATAGGTGCTAATACCGCATAAGCGCACAGGGGCGCATGCCCCGGTGTGAAAA  
494 ACTCCGGTGGTATATGATGGACCCGCGTCTGATTAGCCAGTTGGCAGGGTAA  
495 CGGCCTACCCAAGCGACGATCAGTAGCCG  
496 > Unclassified Lachnospiraceae ggOTU 2087\_OTU095  
497 ATGAACGCTGGCGGCGTGCCTAACACCTGCAAGTCGAACGGGGCCGCGCCTGA  
498 AACCTAGTGAAGGCGCGGCCAGTGGCGGACGGGTGAGTAACGCGTGGGCAA  
499 CCTGCCGCGCACAGGGGGACAACGGCCGAAACGGCCGCTAATACCGCATAT  
500 TCCCCGGGGGCGCATGGCCCTGCGGGGAAAGCCCCGGGGCGACCCGGACGG  
501 TCGCGATGGGCCCGCGTCCGATTAGCTAGTTGGCGGGGCAGCGGCCACCA  
502 AGGCGACGATCGGTAGCCG  
503 > Unclassified Lachnospiraceae ggOTU 2087\_OTU101  
504 ATGAACGCTGGCGGCGTGCCTAACACATGCAAGTCGAACGGAGCGCCCGGAC  
505 GGAGTATTTTCGGTACAAAGACCGGGTGGCTGAGTGGCGGACGGGTGAGTAAC  
506 GCGTGGACAACCTGCCGTGTACAGGGGGATAACAGCCGGAAACGGCTGCTA  
507 ATACCGCATATGCGCACAGTGCCGCATGGCACAGTGCGGAAAGCCTAGATCT  
508 TATCTAGTACGGTACACGATGGGTCCGCGTCTGATTAGGTAGTTGGCGGGGT  
509 AACGGCCCACCAAGCCCACGATCAGTAGCCG  
510 > Unclassified Lachnospiraceae ggOTU 2087\_OTU102  
511 ACGAACGCTGGCGGCGTGCCTAACACATGCAAGTCGAACGGATTTTACTGGA  
512 GCTTGCTCTGGTAAAGTTAGTGGCGGACGGGTGAGTAACGCGTGAGCAACCT  
513 GCCTTACAGAGGGGGACAACATTGGGAAACCGATGCTAATACCGCATAACAT  
514 TGTCTAACCGCATGGTTTGGATAATCAAAGGAGCAATCCGCTGTAAGATGGG  
515 CTCGCGTCCGATTAGATAGTAGGGGGGTAACGGCCCACCTAGTCGACGATCG  
516 GTAGCCG  
517 > Unclassified Lachnospiraceae ggOTU 2087\_OTU107  
518 ATGAACGCTGGACGGCGTGCCTAACACATGCAAGTCGAACGAAGCGCTCGGA  
519 CGGAGTCTCTTCGGAGAGGAAGGCCGGGCGACTGAGTGGCGGACGGGTGAG  
520 TAACGCGTGGGCAACCTGCCCTGCACAGGGGGACAACAGCCGGAAACGGCT  
521 GCTAATACCGCATAAGCGCACAGCTTCGCATGAAGCGGTGCGAAAAGCTTTG  
522 GCGGTGCAGGATGGCCC GCGTCTGATTAGCTTGTGGCGGGGCAACGGGCCA  
523 CCAAGGCGACGATCAGTAGCCG  
524 > Unclassified Lachnospiraceae ggOTU 2087\_OTU111  
525 ATGAACGCTGGCGGCGTGCCTAACACATGCAAGTCGAACGAAGCACATGCCT  
526 GGAACCTCCGGGGGGGAAGGGCATATGACTGAGTGGCGGACGGGTGAGTAA  
527 CGCGTGGGCAACCTGCCCCGCACTGGGGGACAACAGCCGGAAACGGCTGCTA  
528 ATACCGCATATGCGCACAGCTTTGCATGAAGCAGTGTGGAAAACCTCCGGTGG  
529 TCGGGATGGGCCCGCGTCTGATTAGCTGGTTGGCGGGGCAACGGGCCACCA  
530 AGGCGACGATCAGTAGCCG  
531 > Unclassified Lachnospiraceae ggOTU 2087\_OTU112

532 ATGAACGCTGGCGGCGTGCTTAACACATGCAAGTCGAACGGGGGGCAGGAG  
533 GAAACCTAGTGAATCCTGCCCTAGTGGCGGACGGGTGAGTAACGCGTGGGCA  
534 ACCTGCCGCATACCGGGGGATAAACTTAGAAATAGGTGCTAATACCGCATA  
535 AGCGCACAGAGCCGCATGGCTTGGTGTGAAAACTCCGGTGGTATGCGATGG  
536 GCCGCGTCTGATTAGCTTGTGGCGGGGCAGCGGCCACCAAGGCGACGAT  
537 CAGTAGCCG  
538 > Unclassified Lachnospiraceae ggOTU 2087\_OTU114  
539 ATGAACGCTGGCGGCGTGCTTAACACATGCAAGTCGAACGGGGATGCATTAA  
540 GAAGGAGTGCTTGCATTCCGGAAGGATGTATCTTAGTGGCGGACGGGTGAGT  
541 AACGCGTGGGTAACCTGCCCCATACCGGGGGATAACCCTGGAAACAGGTGC  
542 TAATACCGCATAAGCGCACGGGAGCGCATGCTCCTGTGTGAAAACTCCGGT  
543 GGTATGGGATGGACCCGCGTCTGATTAGCCAGTTGGCAGGGTAACGGCCTAC  
544 CAAAGCGACGATCAGTAGCCG  
545 > Unclassified Lachnospiraceae ggOTU 2087\_OTU118  
546 ATGAACGCTGGCGGCGTGCTTAACACATGCAAGTCGAACGGGGAACAGAAT  
547 GAAACCTAGTGATTTTTGTTTTAGTGGCGGACGGGTGAGTAACGCGTGGGTA  
548 ACCTGCCGTATACAGGGGGATAAACTTAGAAATAGGTGCTAATACCGCATA  
549 AGCGCACAGCTTCGCATGGAGCAGTGTGAAAAGCGTAAACGGTATACGATGG  
550 ACCGCGTCTGATTAGCTAGTTGGCGGGGTAGAGGCCACCAAGGCGACGAT  
551 CAGTAGCCG  
552 > Unclassified Lachnospiraceae ggOTU 2087\_OTU119  
553 ATGAACGCTGGCGGCGTGCTTAACACATGCAAGTCGAACGGGGTTATCATT  
554 TTGAAGCGATTAGCTTGCTAAGAGTGGAAAAGTTGATAACTTAGTGGCGGAC  
555 GGGTGAAGTAACGCGTGGGTAACCTGCCTTACACAGGGGGATAAACTTAGAA  
556 ATAGGTGCTAATACCGCATAAGCGCACAGTCCCGCATGGGACAGAGTGAAA  
557 ACATTAGTGGTGAAGATGGACCCGCGTCTGATTAGCTTGTGGCGGGGTAA  
558 CGG  
559 > Unclassified Lachnospiraceae ggOTU 2087\_OTU121  
560 ATGAACGCTGGCGGCGTGCTTAACACATGCAAGTTGAACGAAGCGCTTACAA  
561 CTAATCCTTCAGGAGGAAGAAGTAAGCGACTTAGTGGCGGACGGGTGAGTA  
562 ACGCGTGGGCAACCTGCCCTGTACAGGGGGACAACAGCCGGAAACAGCTGCT  
563 AATACCCATAAAGCGCACAGTAACGCATGTTACAGTGTGAAAAGCCGAGACG  
564 GTACAGGATGGGCCCGCGTCTGATTAGATAGTTGGTGGGGTAGAGGCCTACC  
565 AAGTCAGCGATCAGTAGCCG  
566 > Unclassified Lachnospiraceae ggOTU 2087\_OTU123  
567 ATGAACGCTGGCGGCGTGCTTAACACATGCAAGTCGAACGAAGCGCCCATGC  
568 GGAACCTCCGGGGGAAGCGCGGGCGACTGAGTGGCGGACGGGTGAGTAA  
569 CGCGTGGGCAACCTGCCCCGCACCGGGGGACAACAGCCGGAAACGGCTGCT  
570 AATACCGCATATGCGCGCGGCTCCGCATGGGGCGGCGCGGAAAGCTCCGGCG  
571 GTGCGGGATGGGCCCGCGTCTGATTAGCTGGTTGGCGGGGCAACGGCCCACC  
572 AAGGCGACGATCAGTAGCCG  
573 > Unclassified Lachnospiraceae ggOTU 2087\_OTU136  
574 ATGAACGCTGGCGGCGTGCTTAACACATGCAAGTCGAACGGAGATATTGCTT  
575 GGAAGCTTTTCGAGGTGAAAGAGAAGTATCTTAGTGGCGGACGGGTGAGTAA  
576 CGCGTGGGCAACCTGCCTCATAAGGGGGATAGCATCGGGAACTGGTGGTA  
577 AAACCGCATAAGCGCACGAAGACGCATGTATTCGTGTGAAAAGGAGAAATCT

578 GGTATGAGATGGACCCGCGTCTGATTAGCTAGTTGGAGTGGTAAAAGCACAC  
579 CAAGGCGACGATCAGTAGCCG  
580 > Unclassified Lachnospiraceae ggOTU 2087\_OTU140  
581 ATGAACGCTGGCGGCGTGCCTAACACATGCAAGTCGAACGGACTTATAACGA  
582 AACCTAGTGAATTATAAGTTAGTGGCGGACGGGTGAGTAACGCGTGGAAAAC  
583 CTGCCGTATACTGGGGGATAACACTTAGAAATAGGTGCTAATACCGCATAAG  
584 CGCACAGCTTCGCATGAAGCAGTGTGAAAACTCCGGTGGTATACGATGGTT  
585 CCGCGTCTGATTAGCTAGTTGGTGAGGTA AAAAGCCCACCAAGGCGACGATCA  
586 GTAGCCG  
587 > Unclassified Lachnospiraceae ggOTU 2087\_OTU149  
588 ATGAACGCTGGCGGCGTGCCTAACACATGCAAGTCGAACGGTTAAACCGCCC  
589 TTCGGGGCGGACATACAGTGGCGAACGGGTGAGTAACACGTGACCAACCTGC  
590 CCCGCACCCCGGGACAACCGCCGGAAACGGCGGCTAATACCGGATACTCTCC  
591 GAGGCGCGCATGCGCCACGGAGGAAAGCTCCGACGGTGCGGGATGGGGTCCG  
592 CGGCCATTAGGTAGTAGGCGGGGCAACGGCCCACCTAGCCTGCGATGGGTA  
593 GCCG  
594 > Unclassified Lachnospiraceae ggOTU 2087\_OTU151  
595 ATGAACGCTGGCGGCGTGCCTAACACATGCAAGTCGAACGAAGCGCGCGGG  
596 GCGGGCCCATTTATGGGCAGGCCCTGCGGGACTGAGTGGCGGACGGGTGAGT  
597 AACGCGTGGGCAACCTGCCCATGCCGGGGGACAACGGCCGGAAACGGCCG  
598 CTAATACCGCATAAGCCCAGGGGGCCGCATGGCCCCGCTGGGGAAAGCTCCGG  
599 CGGCATGGGAGGGGCCCGTCTGATTAGCTGGTTGGCGGGGCAGCGGCCCA  
600 CCAAGGCGACGATCAGTAGCCG  
601 > Unclassified Lachnospiraceae ggOTU 2087\_OTU152  
602 ATGAACGCTGGCGGCGTGCCTAACACATGCAAGTCGAACGGAGTTAACATTT  
603 TTAAAGCAAATAGCTTGCTAGGAGTGGAGAAGGTGTTAACTTAGTGGCGGAC  
604 GGGTGAGTAACGCGTGGGTAACCTGCCGTATGCAGGGGGATAACACTTAGAA  
605 ATAGGTGCTAACACCGCATAAGCGCACGAGAGCGCATGCTTTTGTGTGAAAA  
606 ACTCCGGTGGCATAACGATGGACCCGCGTCTGATTAGCCAGTTGGCAGGGTAA  
607 CGGCCTACCAAAGCGACGATCAGTAGCCG  
608 > Unclassified Lachnospiraceae ggOTU 2087\_OTU157  
609 ATGAACGCTGGCGGCGTGCCTAACACATGCAAGTCGAACGAGGCCGTGCCGA  
610 CGGA ACTCTCCGGAGGGAAGACGGCACGGACTTAGTGGCGGACGGGTGAGT  
611 AACGCGTGGGTAACCTGCCCTGTACAGGGGGACAACAGCCGGAAACGGCTG  
612 CTAATACCGCATAAGCCTGCGGGGCCGCATGGCCCCGGCAGGAAAAGCTGCGG  
613 CGGTACAGGATGGGCCCGCGTCTGATTAGCCAGTTGGCGGGGTAACGGCCCA  
614 CCAAAGCAACGATCAGTAGCCG  
615 > Unclassified Lachnospiraceae ggOTU 2087\_OTU158  
616 ATGAACGCTGGCGGCGTGCCTAACACATGCAAGTCGAACGGAGGATGTACGG  
617 TGAAGAGATTTTCGATCAAATCATGTGCATCTTTAGTGGCGGACGGGTGAGTA  
618 ACGCGTGGGTAACCTGCCTTACACAGGGGGATAACACTTAGAAATAGGTGCT  
619 AATACCGCATGAGCGCACAGGACCGCATGGTCGAGTGTGAAAACTGAGGT  
620 GGTGTAAGATGGACCCGCGTCTGATTAGCTAGTTGGTGAGGTAACGGCCAC  
621 CAAGGCGACGATCAGTAGCCG  
622 > Unclassified Lachnospiraceae ggOTU 2087\_OTU160  
623 ATGAACGCTGGCGGCGTGCCTAATACATGCAAGTCGAACGCATATCTTCGGA



624 TATGAGTGGCGAACGGGTGAGTAATACATAAGTAACCTGGCCTTAAGAGGGG  
625 GATAACTATTAGAAATGATAGCTAAGACCGCATAGGTATGAAGATCGCATGA  
626 TCGACATATTAATATCCCACGGGATAGCTGAAGGATGGACTTATGGCGCAT  
627 TAGCTAGTTGGTAGGGTAACGGCCTACCAAGGCGACGATGCGTAGCCG  
628 > Unclassified Lachnospiraceae ggOTU 2087\_OTU170  
629 ACGAACGCTGGCGGGCGTGCTAACACATGCAAGTCGAACGGAGTGCTCCGGA  
630 AAGAGATTTTCGGTCAATGGATGGAGTTACTTAGTGGCGGACGGGTGAGTAAC  
631 GCGTGAGGAACCTGCCTTTCAGAGGGGGACAACAGTTGGAAACGACTGCTAA  
632 TACCGCATAACGCATGGGTATCGCATGGTATCTGTGCCAAAGATTTATCGCTG  
633 AGAGATGGCCTCGCGTCTGATTAGCTAGTTGGTGAGGTAACGGCCCACCAAG  
634 GCGACGATCAGTAGCCG  
635 > Unclassified Lachnospiraceae ggOTU 2087\_OTU192  
636 ATGAACGCTGGCGGGCGTGCTTAACACATGCAAGTCGAGCGAAGCACTTTCTC  
637 GGAAGTTTTTCGGATGGAAGAGGATTTGACTGAGCGGCGGACGGGTGAGTAAC  
638 GCGTGGGGAACCTGCCTCATAACAGGGGAATAACAGTTAGAAATGACTGCTAA  
639 TGCCGCATAAAGCGCACACTGTGGCATCACAGAGTGTGAAAACTCCGGTGGT  
640 ATGAGATGGCCCCGCGTCTGATTAGGCAGTTGGCGGGGTAACGGCCCACCAA  
641 ACCGACGATCAGTAGCCG  
642 > Unclassified Lachnospiraceae ggOTU 2087\_OTU195  
643 ATGAACGCTGGCGGGCGTGCTTAACACATGCAAGTCGAACGAAGCACTTGAGA  
644 TTGAATCTTCGGATGAGA ACTCTTGTGACTGAGTGGCGGACGGGTGAGTAAC  
645 GCGTGGGTAACCTACCTCATAACAGGGGGATAACAGTTGGAAACGACCGCTAA  
646 TACCGCATAACCCGCTAGTATCGCATGATACAGACGGAAAAGATTTATCGGT  
647 ATGAGATGGGCCCCGCGTCTGATTAGCCAGTTGGCAGGGTAACGGCCTACCAA  
648 AGCAACGATCAGTAGCCG  
649 > Unclassified Lachnospiraceae ggOTU 2087\_OTU198  
650 ATGAACGCTGGCGGGCGTGCTTAACACATGCAAGTCGAACGAAGCACTTTACT  
651 TTGATTCCTTCGGGTTGATTAGTACTGTGACTGAGTGGCGGACGGGTGAGTAA  
652 CGCGTGGGTAACCTGCCCCATAACAGGGGGATAACAGATAGAAATGTCTGCTA  
653 ATACCGCATAAGACCACAGCGCCGCATGGTGCAGGGGTAAAACTCCGGTGG  
654 TATGGGATGGACCCGCGTCTGATTAGCTGGTTGGTGAGGTA AAGGCTCACCA  
655 AGGCGACGATCAGTAGCCG  
656 > Unclassified Lachnospiraceae ggOTU 2087\_OTU201  
657 ATGAACGCTGGCGGGCGTGCTTAACACATGCAAGTCGAACGGGGCGCGCCGGC  
658 GGGGGCCCTCCGGGGCTGAAGCCGGCGCCGCCAGTGGCGGACGGGTGAGT  
659 AACGCGTGGGCAACCTGCCCCGCACTGGGGGACAACAGCCGGAACGGCTG  
660 CTAATACCGCATGGGCGCACAGCCCCGCATGGGGCGGTGCGGAAAGCCTTGG  
661 CGGTGCGGGATGGGCCCCGCGTCTGATTAGCTTGTGGCGGGGCAACGGCCCA  
662 CCAAGGCGACGATCAGTAGCCG  
663 > Unclassified Lachnospiraceae ggOTU 2087\_OTU202  
664 ATGAACGCTGGCGGGCGTGCTTAACACATGCAAGTCGAACGGAGCACCCCTGA  
665 TGGAGTTTTTCGGACAACAGATGGGAATGCTTAGTGGCGGACGGGTGAGTAAC  
666 GCGTGAGGAACCTGCCTTGGAGAGGGGAATAACACAGTGAAAATTGTGCTAA  
667 TACCGCATGATGCAGTTGGGTCGCATGGCTCTGACTGCCAAAGATTTATCGCT  
668 CTGAGATGGCCTCGCGTCTGATTAGCTGGTTGGTGGGGTAACGGCCCACCAA  
669 GGCGACGATCAGTAGCCG

670 > Unclassified Lachnospiraceae ggOTU 2087\_OTU205  
671 ACGAACGCTGGCGGCGTGCTTAACACATGCAAGTCGAACGAAGAACTAGAG  
672 ATGAATTCTTCGGAAGGAGTTTTTAGTTACTTAGTGGCGGACGGGTGAGTAA  
673 CGCGTGAGCAACCTGCCATAAGAGGGGGATAACAGCTGGAAACGGCTGCT  
674 AATACCGCATAAGACCACATTGCCACATGGCAGAGGGGTCAAAGATTTATCG  
675 CTTATGGATGGGCTCGCGTCTGATTAGCTAGTTGGTAGGGTAACGGCCTACCA  
676 AGGCGACGATCAGTAGCCG  
677 > Unclassified Lachnospiraceae ggOTU 2087\_OTU216  
678 ATGAACGCTGGCGGCGTGCTTAACACATGCAAGTCGAACGGGATAAGAGAT  
679 GCTTGCAATTTCTTATCAAGTGGCGGACGGGTGAGTAACGCGTGGATAATCTG  
680 CCCTACACAGGGGGATAACAGCCGAAACGGCTGCTAATACCGCATAGACTG  
681 AGCTTTCGCATGAGAGAACAGGGAAAGATTTATCGGTGTAGGATGAATCCGC  
682 GTCCGATTAGCTAGTTGGAGGGGTAACGGCCCACCAAGGCGACGATCGGTAG  
683 CCG  
684 > Unclassified Lachnospiraceae ggOTU 2087\_OTU242  
685 ATGAACGCTGGCGGCGTGCTTAACACATGCAAGTCGAGCGAAGCACTTTGTT  
686 TTGAATCTTCGAGGAAGAACGAAGTGACTGAGCGGCGGACGGGTGAGTAA  
687 CGCGTGGGCAACCTGCCTCATAAGGGGGATAACAGTTAGAAATGACTGCTA  
688 ATACCGTATAAGACCACGGTACTGCATGGTACAGTGGTAAAACTCCGGTGG  
689 TATGAGATGGGCCCGCGTCTGATTAGCTAGTTGGTGAGGTAACGGCTCACCA  
690 AGGCAACGATCAGTAGCCG  
691 > Unclassified Lachnospiraceae ggOTU 2087\_OTU246  
692 ATGAACGCTGGCGGCGTGCTTAACACATGCAAGTCGAACGGAGTACCCTTGA  
693 AGGAGTTTTTCGGACAACCTGAAAGGACTACTTAGTGGCGGACGGGTGAGTAAC  
694 GCGTGAGTAACCTGCCTTGGAGTGGGGAATAACAGCTGGAAACAGCTGCTAA  
695 TACCGCATGATGCAGTTGAGTCGCATGGCTCTGACTGCCAAAGATTTATCGCT  
696 CTGAGATGGACTCGCGTCTGATTAGCTAGTTGGTGGGGCAACGGCCCACCA  
697 GGCGACGATCAGTAGCCG  
698 > Unclassified Lachnospiraceae ggOTU 2087\_OTU250  
699 ATGAACGCTGGCGGCATGCCTAAGACATGCAAGTCGTACGAGGAGGCCATT  
700 GAAGATGAAGTGCTTGCCTGACTGATTTGGATTTGGATTCCTCCTAGTGGCAAAC  
701 GGGTGAGTAACACGTGGGTTACCTACCTTTATGTTGGGGATAACAGTTGGAA  
702 ACGATTGCTAATACCGAATGTGCTCTACGGAGTAAAGAAGCCCTTAAAGCTT  
703 CGCATAAAGATGGGCCTGCGGTGCATTAGCTTGTGGTGGGGTAATGGCCTA  
704 CCAAGGCAACGATGCATAGCCG  
705 > Unclassified Lachnospiraceae ggOTU 2087\_OTU252  
706 ATAAACGCTGGCGGCGCACATAAGACATGCAAGTCGAACGGAAGTCGTTATA  
707 AAACGGATTGAAGATTTATCTGAAAGAAGTTTTGTAACAATGGCTTTAGTGG  
708 CGGACTGGTGAGTAACACGTAAGCAACCTACCTATTAGAGGGGGATAACAGT  
709 GAGAAATCATTGCTAATACCGCATAAGCTTGTAGTATCGCATGATATAGCAA  
710 GAAAAGGAGAAATCCGCTAATAGATGGGCTTGC GGCTGATTAGCTAGTTGGT  
711 AAGGTAACGGCTTACCAAGGCAACGATCAGTAGCCG  
712 > Unclassified Lachnospiraceae ggOTU 2087\_OTU256  
713 ATGAACGCTGGCGGCGTGCTTAACACATGCAAGTCGAGCGGAGCGGTCTTGA  
714 TGAAGTTTTTCGGATGGAATCAGGATTGTCTTAGCGGCGGACGGGTGAGTAA  
715 ACTTGATAACCTGCCTTATACTGGGGGATAACAGCCAGAAATGGCTGCTAA

716 TACCGCATAAGCGCACGGCGCCGCATGGCGCAGTGTGAAAACTCCGGTGGT  
717 ATAAGATGGATCCGCGCCTGATTAGCTAGTTGGCGGGGCAGCGGCCACCAA  
718 GCGGACGATCAGTAGCCG  
719 > Unclassified Lachnospiraceae ggOTU 2087\_OTU257  
720 ATGAACGCTGGCGGGCGTGCTTAACACATGCAAGTCGAGCGAAGCACTCGGCC  
721 TTGAATCTTCGGAGGAAAGGCGGTTTACTGAGCGGGCGGACGGGTGAGTAAC  
722 GCGTGGGCAACCTGCCCCATACGGGGGGATAACAGTTAGAAATGACTGCTAA  
723 TACCGCATAAGACCGCGGTGCCGCATGGCACAGCGGTAAAAAACTCCGGTGG  
724 TATGGGATGGGGCCCGCTGATTAGCTAGGTTGGCGGGGTAACGGCCCAC  
725 CAAGGCGACGATCAGTAGCCG  
726 > Unclassified Lachnospiraceae ggOTU 2087\_OTU268  
727 ACGAACGCTGGCGGGCGTGCTAATACATGCAAGTAGAACGCTGAAGAGAGG  
728 AGCTTGCTCTTCTTGGATGAGTTGCGAACGGGTGAGTAACGCGTAGGTAACC  
729 TGCCTTGTAGCGGGGGATAACTATTGGAAACGATAGCTAATACCGCATAACA  
730 ATGGATGACACATGTCATTTATTTGAAAGGGGCAATTGCTCCACTACAAGAT  
731 GGACCTGCGTTGTATTAGCTAGTAGGTGAGGTAATGGCTCACCTAGGCGACG  
732 ATACATAGCCG  
733 > Unclassified Lachnospiraceae ggOTU 2087\_OTU270  
734 ATGAACGCTGGCGGCATGCCTAAGACATGCAAGTCGAACGAAGTGGCCCAAT  
735 GAAAATTGCGTGCTTGCACAAAATTGGATTTGGATTTTCCACTTAGTGGCAGA  
736 CGGGTGAGTAATGCACAGGTAACCTACCCTAAGGACTGGGACAACCTATTGGA  
737 AACGATAGCTAATACCGGATGATTCATAGATAGATAACTATTTATGCTAAAA  
738 AGGAGCTTCGGCTTCACCTCAGGATGGGCTTGTGTTGTATTAGTTAGTTGGTG  
739 AGGTAATGGCCCACCAAGACTACGATGCATATCCG  
740 > Unclassified Lachnospiraceae ggOTU 2087\_OTU274  
741 ACGAACGCTGGCGGGCGTGCTTAACACATGCAAGTCGAACGGGGTGCCTATGA  
742 AAGAGATTTTCGGTCAATGGATTAGGTTACTTAGTGCGGACGGGTGAGTAAC  
743 GCGTGAGGAACCTGCCTTTCAGAGGGGGACAACAGCTGGAAACGGCTGCTAA  
744 TACCGCATGACACATATTTATCGCATGGTAGATATGTCAAAGATTTATCGCTG  
745 AGAGATGGCCTCGCGTCCGATTAGGCAGTTGGCGGGGTAACGGCCCACCAA  
746 CCGACAATCGGTAGCCG  
747 > Unclassified Lachnospiraceae ggOTU 2087\_OTU283  
748 ATGAACGCTGGCGGGCGTGCTTAACACATGCAAGTCGAGCGAAGCGATAAAGT  
749 GAAATTTTTTCGGAATGAAGCCATATTGACTTAGCGGCGGACGGGTGAGTAAC  
750 GCGTGGGTAACCTGCCTCATAACGGGGGATAACAGTTAGAAATGACTGCTAA  
751 TACCGCATAAGCGCACGGGACTGCATGGTCCAGTGTGAAAAAACCGAGGTGG  
752 TATGAGATGGACCCGCGTCTGATTAGCTGGTTGGCGGGGTAACGGCCCACCAA  
753 GCGGACGATCAGTAGCCG  
754 > Unclassified Lachnospiraceae ggOTU 2087\_OTU287  
755 ATGAACGCTGGCGGGCGTGCTTAACACATGCAAGTCGAACGAAGCACAGATGT  
756 AGAATTTCTTCGGAAAGGAAGCGCCTGTGACTGAGTGGCGGACGGGTGAGTA  
757 ACGCGTGGGCAACCTGCCTCATAACGGGGGACAACAGTTGGAAACAACCTGCT  
758 AATACCGCATAAGCGCACACTGTCGCATGACAGAGTGTGAAAATTTCCGGAG  
759 GTATACGATGGACCCGCGTCTGATTAGCCAGTTGGCAGGTAACGGCCTACCA  
760 AAGCAACGATCAGTAGCCG  
761 > Unclassified Lachnospiraceae ggOTU 2087\_OTU297

762 ATGAACGCTGGCGGCATGCCTAATACATGCAAGTCGAACGGACTTGAGGAGA  
763 GCTTGCTTTCCGCAAGTCAGTGGCGAACGGGTGAGTAACACGTAGGCAACCT  
764 GCCCATGTACCCGGGATAACAGACGGAAACGACTGCTAAAACCGGATAGGT  
765 AAGAGGGAGGCATCTTCCGCTTATCAAAGCACCCAAGGGTGTGGACATGGAT  
766 GGGCCTGCGGCGCATTAGCCGGTTGGCGGGGTAACGGCTCACCAAGGCGACG  
767 ATGCATAGCCG  
768 > Unclassified Lachnospiraceae ggOTU 2087\_OTU298  
769 ACGAACGCTGGCGGCGTGCTTAACACATGCAAGTCGAACGGAAAGGCCCTTC  
770 GGGGTACTCGAGTGGCGAACGGGTGAGTAACACGTGGGTGATCTGCCCTGCA  
771 CTTTGGGATAAGCCTGGGAAACTGGGTCTAATACCGAATATACCTCTTGGGT  
772 GCATGACCTTTGGGGGAAAGCTTTTGCGGTGTGGGATGGGCCCGCGGCCTAT  
773 CAGCTTGTGGTGGGGTGTGGCCTACCAAGGCGACGACGGGTAGCCG  
774 > Unclassified Lachnospiraceae ggOTU 2087\_OTU301  
775 ATAAACGCTGGCGGCGCACATAAGACATGCAAGTCGAACGGACAGAAGCCA  
776 AATGTTTACATTAGGTGGAAGTTAGTGGCGGACTGGTGAGTAACACGTAAGC  
777 AACCTGCCTATTAGAGGGGAATAACAGTGAGAAATCATTGCTAATACCGCAT  
778 ATGCCATAAAGACCACATGGTCTTAGTGGGAAAGGAGAAATCCGCTAATAGA  
779 TGGGCTTGCCTGATTAGCTAGTTGGTGGGGTAAAGGCCTACCAAGGCGAC  
780 GATCAGTAGCCG  
781 > Unclassified Lachnospiraceae ggOTU 2087\_OTU304  
782 ATGAACGCTAGCGACAGGCTTAACACATGCAAGTCGAGGGGGCAGCGGTGGT  
783 GAAGGCTTGCCTTACCAGCCGGCGACCGGCGCACGGGTGAGTAACACGTAT  
784 GCAACCTGGCCGTGACAGATGGATAACCGGGAGAAATCCCGCCTAATACAAC  
785 ATAATGCCGGGAGGGGACATCCCCTGCCGGCCAAAGGGGGCGACCCGGTCAT  
786 GGATGGGCAGTGCGGCGCATTAGGTAGTTGGTGGGGCAACGGGCCCAACAG  
787 CCGACGATGCGTAGGGG  
788 > Unclassified Lachnospiraceae ggOTU 2087\_OTU307  
789 ATGAACGCTAGCTACAGGCTTAACACATGCAAGTCGAGGGGGCAGCATGAACT  
790 TAGCTTGCTAAGTTTGTATGGCGACCGGCGCACGGGTGAGTAACGCGTATCCA  
791 ACCTTCCCATGGCTGCGGGATAGCCCGGTGAAAACCGGATTAATACCGCATG  
792 GCGTCCCTTGACGGCGTCCGACAGGGACTAAAGTTTTTTCGGCCATGGATGG  
793 GGATGCGTCCGATTAGCTTGTGGCGGGGTAACGGCCCACCAAGGCTACGAT  
794 CGGTAGGGG  
795 > Unclassified Lachnospiraceae ggOTU 2087\_OTU309  
796 ATGAACGCTGGCGGCATGCCTAAGACATGCAAGTCGAACGAGGTGGCCCAAT  
797 GAAGATGGAGTGCTTGCACAAAGTTGGAAATGGATTCCCATCTAGTGGCGCA  
798 AGGGTGAGTAACACGTGGGTAATCTACCTTTGAGTTTGGAAATAACAATTAGA  
799 AATGATTGCTAATGCCGAATTATATAAGCAGATACGTCTGCATATATTTAA  
800 AGGAGCCTTTAAAGCTTCGCTTAAAGATGAGCCTGCGCCGTATCAGCTAGTT  
801 GGTAAGGTAATGGCTTACCAAGGCAACGATGCGTAGCCG  
802 > Unclassified Lachnospiraceae ggOTU 2087\_OTU326  
803 ATGAACGCTGGCGGCGTGCTTAACACATGCAAGTCGAACGGAACTGTCATTT  
804 TTGAAGCAATTAGCTTGCTAAGGGTGGAAATGTTGGCAGTTTAGTGGCGGAC  
805 GGGTGAGTAACGCGTGGGTAACCTGCCTTACACAGGGGGATAACACCTGGAA  
806 ACAGGTGCTAATACCGCATAAGCGCACAGTCCCGCATGGGACAGAGTGAAA  
807 AACATTAGTGGTATACGATGGACCCGCGTCCGATTAGCTAGTTGGCGGGATA

808 AGAGCCCACCAAGGCGACGATCGGTAGCCG  
 809  
 810 >Unclassified Clostridiales ggOTU 1995\_OTU023  
 811 ATAAACGCTGGCGGCGCACATAAGACATGCAAGTCGAACGGACTTAACCATT  
 812 AGTTTACTATTGGAGCGGTTAGTGGCGGACTGGTGAGTAACACGTAAGCAAC  
 813 CTGCCTATCAGAGGGGAACAACAGTTAGAAATGACTGCTAATACCGCATATG  
 814 CCTTGAGTACCACATGGTACAAAAGGGAAAGGAGCAATCCGCTGATAGATGG  
 815 GCTTGCGTCTGATTAGATAGTTGGTGGGGTAACGGCCTACCAAGTCGACGAT  
 816 CAGTAGCCG  
 817 > Unclassified Clostridiales ggOTU 1995\_OTU033  
 818 AAACGCTGGCGGCGCACATAAGACATGCAAGTCGAACGAACTTAACCCTTTG  
 819 TTTACATTGGGAGCGGTTAGTGGCGGACTGGTGAGTAACACGTAAGCAACCT  
 820 GCCTATTAGAGGGGAATAACAGTGAGAAATCATTGCTAATACCGCATATGCT  
 821 CACAGTATCACATGATACAGTGAGGAAAGGAGCAATCCACTAATAGATGGGC  
 822 TTGCGTCTGATTAGCTAGTTGGTGGGGTAACGGCCTACCAAGGCGACGATCA  
 823 GTAGCCG  
 824 > Unclassified Clostridiales ggOTU 1995\_OTU040  
 825 ACGAACGCTGGCGGCGTGCCTAACACATGCAAGTCGAACGAGAATCTTATGT  
 826 GTGATCCCTTCGGGGTGAACCTTTAAGAGGAAAGTGGCGGACGGGCGAGTAA  
 827 CGCGTGAGTAACCTGCCATAAGAGGGGGATAATCCATGGAAACGTGGACTA  
 828 ATACCGCATATTGAATATTACCGCATGGTAGATATTTGAAAGATTTATCGCTT  
 829 ATGGATGGACTCGCGTCAGATTAGCTGGTTGGTGAGGTAACGGCTCACCAAG  
 830 GCGACGATCTGTAGCCG  
 831 > Unclassified Clostridiales ggOTU 1995\_OTU074  
 832 AAACGCTGGCGGCGCACATAAGACATGCAAGTCGAACGAACTTAACCTCATT  
 833 TTTTAGATTGAGAGCGGTTAGTGGCGGACTGGTGAGTAACACGTAAGCAACC  
 834 TGCCTATCAGAGGGGAATAACAGTGAGAAATCATTGCTAATACCGCATAAGC  
 835 TAGTAGTATCACATGATACAGCTAGAAAAGGAGTAATCCGCTGATAGATGGG  
 836 CTTGCGCCTGATTAGCTAGTTGGTGGGGTAACGCCTACCAAGGCGACGATCA  
 837 GTAGCCG  
 838 > Unclassified Clostridiales ggOTU 1995\_OTU097  
 839 ATGAACGCTGGCGGCATGCCTAAGACATGCAAGTCGAACGAGGTGGCCCACA  
 840 GAATTTGATAGAAGCTTTGAGAGCTTGCTCGAGAAGTGGAAGAGAAGGAC  
 841 GTGGAATTTCCACCTAGTGGCAAACGGGTGAGTAACACGTGGGTTACCTACC  
 842 TCTTAGATGGGGATACCAATTGGAAACGATTGTTAATACCGAATGTGATCTA  
 843 CGGATTAAGGGAGCCTTTAAAGCTTCGCTAAGAGATGGGCCTGCGGTGCAT  
 844 TAGATAGTTGGTGGGTAAGAGCCTACCAAGTCAACGATGCATAGCTG  
 845 > Unclassified Clostridiales ggOTU 1995\_OTU147  
 846 ATGAACGCTGGCGGCGTGCCTAACACATGCAAGTCGAACGGGTGAGAGCGG  
 847 AAACCTAGTGAAGCTCTCACGAGTGGCGGACGGGTGAGTAACGCGTGGGCA  
 848 ACCTGCCGTATACAGGGGGATAAACTTAGAAATAGGTGCTAAAACCGCATA  
 849 AGCGCACAAAGGCCGCATGGCCGGGTGCGAAAACTCCGGTGGTATACGAT  
 850 GGACCCGCGTCCGATTAGCTAGTTGGCGGGATAAGAGCCCACCAAGGCGACG  
 851 ATCGGTAGCCG  
 852 > Unclassified Clostridiales ggOTU 1995\_OTU166  
 853 ATGAACGCTGGCGGCGTGCCTAACACATGCAAGTCGAACGAGAACCAACGG

854 ATTGAGGATTCGTCCAAATGAAGTTGGGGAAAGTGGCGGACGGGTGAGTAAC  
855 GCGTGAGCAATCTGCCTTGGAGTGGGGAATAACGGTTGGAAACAGCCGCTAA  
856 TACCGCATGATGCGTCTGGGAGGCATCTCTCTGGACGCCAAAGATTTATCGCT  
857 CTGAGATGAGCTCGCGTCTGATTAGCTAGTTGGCGGGGCAACGGCCCACCAA  
858 GGCGACGATCAGTAGCCG  
859 > Unclassified Clostridiales ggOTU 1995\_OTU169  
860 ATGAACGCTAGCGACAGGCTTAACACATGCAAGTCGAGGGGCAGCGGGGAT  
861 GAAGCTTGCTTCATCCGCCGGCGACCGGCGCACGGGTGAGTAACACGTATGC  
862 AACCTGCCCCCTGGCTGGGGGATAAGCCGGAGAAATCCGGTCTAATACCGCGT  
863 AACATCCTTGCGGGACATCCCGTTAGGATCAAAGGAGCGATTCCGGCCAGGG  
864 ATGGGCATGCGGCGCATTAGCTAGTCGGCGGGGTAACGGCCCACCGAGGCGA  
865 CGATGCGTAGGGG  
866 > Unclassified Clostridiales ggOTU 1995\_OTU184  
867 ATAAACGCTGGCGGCGCACATAAGACATGCAAGTCGAACGAACTTAATCTCT  
868 TGCTTGCAAGAGAAGCGGTTAGTGGCGGACTGGTGAGTAACACGTAAGAAAT  
869 CTGCCTATCAGAGGGGAATAACAATGAGAAATCATTGCTAATACCGCATATG  
870 CCATAGGGCTCGCATGAGCCTAGTGGGAAAGGAGTAATCCGCTGATAGATGA  
871 GCTTGCGTCTGATTAGCTAGTTGGTGGGGTAAAGGCCTACCAAGGCGACGAT  
872 CAGTAGCCG  
873 > Unclassified Clostridiales ggOTU 1995\_OTU226  
874 ACGAACGCTGGCGGCGCGCCTAACACATGCAAGTCGAACGGACGAGGAAGT  
875 GCTTGCACTTCCGAGTTAGTGGCGGACGGGTGAGTAACACGTGAGCAACCTG  
876 CCTTTTAGAGGGGGATAACGTCCTGAAAAGGACGCTAATACCGCATAAAGTC  
877 GAGATGTGGCATCGCATCATGACCAAAGGAGTAATCCGCTGAAAGATGGGCT  
878 CGCGCCTGATTAGCTAGTTGGAGTGGTAACGGCACACCAAGGCGACGATCAG  
879 TAGCCG  
880 > Unclassified Clostridiales ggOTU 1995\_OTU265  
881 ATGAACGCTGGCGGCGTGCTTAACACATGCAAGTCGAACGGGGGATGTACAG  
882 CGGGAAGATTTCCGGTCGGACCAAGTGCATGCCTAGTGGCGGACGGGTGAGTA  
883 ACGCGTGGGTAACCTGCCTTACACAGGGGGATAAACTTAGAAATAGGTGCT  
884 AATACCGCATGAGCGCACAGGACCGCATGGTCGAGTGTGAAAACTGAGGT  
885 GGTGTAAGATGGACCCGCGTCTGATTAGCTAGTTGGTGAGGTAACGGCCCAC  
886 CAAGGCGACGATCAGTAGCCG  
887 > Unclassified Clostridiales ggOTU 1995\_OTU331  
888 ACGAACGCTGGCGGCAGGCCTAACACATGCAAGTCGAGCGCACCTTCGGGGT  
889 GAGCGGCGGACGGGTGAGTATCGCGTGGGAACGTGCCCTTCTCTACGGAATA  
890 GTCCTGGGAAACTGGGGGTAATACCGTATACGCCCTTTGGGGGAAAGATTTA  
891 TCGGAGAAGGATCGGCCCGCGTTGGATTAGGTAGTTGGTGGGGTAAATGGCTC  
892 ACCAAGCCGACGATCCATAGCTG  
893  
894 >Lactobacillus ggOTU 1865\_OTU001  
895 ATGAACGCTGGCGGCGTGCTTAACACATGCAAGTCGAACGAACTTCTTTAT  
896 CACCGAGTGCTTGCCTCACCATAAAGAGTTGAGTGGCGAACGGGTGAGTA  
897 ACACGTGGGCAACCTGCCAAAAGAGGGGGATAAACTTGGAAACAGGTGC  
898 TAATACCGCATAACCATAGTTACCGCATGGTAACTATGTAAAAAGGTGGCTA  
899 TGCTACCGCTTTTGGATGGGCCCGCGGCGCATTAGCTAGTTGGTGGGGTAAA

900 > *Lactobacillus* ggOTU 1865\_OTU016  
 901 ACGAACGCTGGCGGCGTGCCTAATACATGCAAGTCGAGCGAGCTTGCCTAGA  
 902 TGATTTTAGTGCTTGCCTAAATGAACTAGATACAAGCGAGCGGCGGACGG  
 903 GTGAGTAACACGTGGGTAACCTGCCCAAGAGACTGGGATAACACCTGGAAAC  
 904 AGATGCTAATACCGGATAACAACACTAGACGCATGTCTAGAGTTTGAAAGAT  
 905 GGTCTGCTATCACTCTTGGATGGACCTGCGGTGCATTAGCTAGTTGGTAAGG  
 906 TAACGGC  
 907 > *Akkermansia* municiphila\_OTU013  
 908 ACGAACGCTGGCGGCGTGGATAAGACATGCAAGTCGAACGGGAGAATTGCT  
 909 AGCTTGCTAATAATTCTCTAGTGGCGCACGGGTGAGTAACACGTGAGTAACC  
 910 TGCCCCGAGAGCGGGATAGCCCTGGGAACTGGGATTAATACCGCATAGTA  
 911 TCGAAAGATTAAAGCAGCAATGCGCTTGGGGATGGGCTCGCGGCCTATTAGT  
 912 TAGTTGGTGAGGTAACGGCTACCAAGGCGATGACGGGTAGCCG  
 913  
 914 >Unclassified *Lactobacillus*\_OTU009  
 915 ATGAACGCCGGCGGTGCTAATACATGCAAGTCGTACGCACTGGCCCAAC  
 916 TAATTGATGGTGCTTGCACCTGATTGACGTTGGATCACCAGTGAGTGGCGGA  
 917 CGGGTGAGTAACACGTAGGTAACCTGCCCTGGAGCGGGGGATAACATTTGGA  
 918 AACAGATGCTAATACCGCATAACAACAAAAGCCACATGGCTTTTGTGTTGAA  
 919 ATGGCTTTGGCTATCACTCTGGGATGGACCTGCGGTGCATTAGCTAGTTGGTA  
 920 AGGTAACGGCTTACCAAGGCGATGATGCATAGCCG  
 921  
 922 >Unclassified *Lachnospiraceae*\_OTU017  
 923 ATGAACGCTGGCGGCGTGCCTAACACATGCAAGTCGAGCGAAACATTTAAGA  
 924 CAGATCCTTCGGGTGAAGTCTTATCTGATTGAGCGGCGGACGGGTGAGTAAC  
 925 GCGTGGGTAACCTGCCTCATAACAGGGGGATAACAGTTAGAAATGACTGCTAA  
 926 TACCGCATAAAGCGCACAGGGCTGCATGGCCCGGTGTGAAAACTCCGGTGGT  
 927 ATGAGATGGACCCGCGTCTGATTAGCTGGTTGGAGGGGTAACGGCCACC  
 928 > Unclassified *Lachnospiraceae*\_OTU032  
 929 ATGAACGCTGGCGGCGTGCCTAACACATGCAAGTCGAACGAAGCACCTGAGA  
 930 ATGATTCTTCGGATGAAGTCTTGTGACTGAGTGGCGGACGGGTGAGTAAC  
 931 GCGTGGGTAACCTGCCTCACACAGGGGGATAACAGTTGGAAACGACCGCTAA  
 932 TACCGCATAAACCGCTGGTGCCGCATGGCACTGACGGAAAAGATTTATCGGT  
 933 GTGAGATGGACCCGCGTCTGATTAGCCAGTTGGCAGGGTAACGGCCTACC  
 934 > Unclassified *Lachnospiraceae*\_OTU044  
 935 ATGAACGCTGGCGGCGTGCCTAACACATGCAAGTCGAGCGAAGCACTTTGTT  
 936 AGAACTTTTCGGAGGGACGAGGAAGTGACTGAGCGGCGGACGGGTGAGTAA  
 937 CGCGTGGGCAACCTGCCTTACACAGGGGGATAACAGTTAGAAATGACTGCTA  
 938 ATACCGCATAAGACCACATTGCCGCATGGCAGGGTGGTAAAACTCCGGTGG  
 939 TGTAAGATGGGCCCGCGTCTGATTAGGTAGTTGGCAGGGTAGAGGCCTACCA  
 940 AGCCTACGATCAGTAGCCG  
 941 > Unclassified *Lachnospiraceae*\_OTU053  
 942 ATGAACGCTGGCGGCGTGCCTAACACATGCAACCGTCGAACGAAGCACAGAT  
 943 GTAGAATTTCTTCGGAAAGGAAGCGCCTGTGACTGAGTGGCGGACGGGTGAG  
 944 TAACGCGTGGGCAACCTGCCCCATACCGGGGGACAACAGCTGGAAACGGCTG  
 945 CTAATACCGCATAACGTTTTTCGGTGCCGCATGGCGCCGAAAAGAAAACCTCCGG

946 TGGTATGGGATGGGCCCGCGTCTGATTAGCTAGTTGGGAGGGTAACGGCCTA  
 947 CCAAGGCGACGATCAGTAGCCG  
 948 > Unclassified Lachnospiraceae\_OTU065  
 949 ATGAACGCTGGCGGCGTGCCTAACACATGCAAGTCGAGCGAAGCGATTTTGA  
 950 GGAAGTTTTCGGATGGAATCGAAATTGACTTAGCGGGCGGACGGGTGAGTAAC  
 951 ACGTGGGTAATCTGCCTTATACAGGGGGATAACAGTTAGAAATGACTGCTAA  
 952 TACCGCATAAGCGCACGGGAACGCATGTTTCTGTGTGAAAACTCCGGTAGT  
 953 ATAAGATGAGCCCGCGTCTGATTAGCTGGTTGGTGGGGTAACGGCCTACCAA  
 954 GGCGACGATCAGTAGCCG  
 955 > Unclassified Lachnospiraceae\_OTU067  
 956 ATGAACGCTGGCGGCGTGCCTAACACATGCAAGTCGAACGGAGATATCATT  
 957 TCGAAGCGATTAGTTTACTAAGAGTAGAGATGTTGATATCTTAGTGGCGGAC  
 958 GGGTGAGTAACGCGTGGGTAACCTGCCTTACACTGGGGGATAACACTTAGAA  
 959 ATAGGTGCTAATACCGCATAATAGGAGAAGACGCATGTCTTATCCTTGAAAA  
 960 CTCGGGTGGTGTAAAGATGGACCCGCGTCTGATTAGCCAGTTGGCGGGGTAAC  
 961 GGCCACCAAAGCGACGATCAGTAGCCG  
 962 > Unclassified Lachnospiraceae\_OTU071  
 963 ATGAACGCTGGCGGCGTGCCTAACACATGCAAGTCGAACGGATCTGTATTGA  
 964 AACCTAGTGATATACAGGTTAGTGGCGGACGGGTGAGTAACGCGTGGATAAC  
 965 CTGCCGTATACCGGGGATAACACTTAGAAATAGGTGCTAATACCGCATGAG  
 966 CGCACAGCTCCGCATGGAGCAGTGTGAAAACTCCGGTGGTATACGATGGAT  
 967 CCGCGTCTGATTAGCCAGTTGGCGGGGTAACGGCCACCAAAGCGACGATCA  
 968 GTAGCCG  
 969 > Unclassified Lachnospiraceae\_OTU081  
 970 ATGAACGCTAGCGGCAGGCCTAACACATGCAAGTCGAGGGGCAGCATTTCCG  
 971 TAGTAATATCGGAGATGGCGACCGGCGCACGGGTGCGTAACGCGTATGTAAC  
 972 CTACCTTAAACAGGGGGATAACACCGAGAAATTGGTACTAATACCCATAAT  
 973 ACCATTGGAGGCATCTCTGGTGGTTGAAAGTTCCGGCGGTTTAAAGATGGACA  
 974 TCGTGTGATTAGTTAGTTGGTGGTAAACGGCTCACCAAGACAACGATACA  
 975 TAGGGG  
 976 > Unclassified Lachnospiraceae\_OTU084  
 977 ATGAACGCTAGCGACAGGCTAACACATGCAAGTCGAGGGGCAGCGGGGCG  
 978 AGTGCTTGCTCTGCCGGCGACCGGCGCACGGGTGAGTAACACGTATGCAACC  
 979 TGCCCTCCGCAGGGGGATAAACCGGAGAAATCCGGACTAATACCGCGTGGTA  
 980 CACCTGTGGGGCATCCCACGGGTGTTAAAAGGAAGTGATTCCGGCGGAGGAT  
 981 GGGCATGCGGCGCATTAGCTTGTGGCGGGGTAACGGCCACCAAAGGCGACG  
 982 ATGCGTAGGGG  
 983 > Unclassified Lachnospiraceae\_OTU091  
 984 GAACGCTGGCGGCGTGCCTAACACATGCAAGTCGAGCGAAGCACTTTAATTC  
 985 GATTCTTCGGATGAAGATTTTTGTGACTGAGCGGCGGACGGGTGAGTAACGC  
 986 GTGGGCAACCTGCCTTACACAGGGGGATAACAGTTAGAAATGACTGCTAATA  
 987 CCGCATAAGACCGCAGTACCGCATGGTACAGCGGTAAAACTCCGGTGGTGT  
 988 AAGATGGGCCCGCGTCTGATTAGGTAGTTGGCGGGGTAACGGCCACCAAAGC  
 989 CGACGATC  
 990 > Unclassified Lachnospiraceae\_OTU093  
 991 ATGAACGCTGGCGGCGTGCCTAACACATGCAAGTCGAACGAAGCGCTTAAGA



992 ACGATTCTTCGGATGAAGTCTTTTGTGACTGAGTGACGGACGGGTGAGTAAC  
 993 GCGTGGGTAACCTGCCTCACACAGGGGGATAACAGTTGGAAACGACCGCTAA  
 994 TACCGCATAACCCGCTGGTATCGCATGATACTGACGGAAAAGATTTATCGGT  
 995 GTGAGATGGACCCGCGTCTGATTAGCCAGTTGGCAGGGTAACGGCCTACCAA  
 996 AGCGACGATCAGTAGCCG  
 997 > Unclassified Lachnospiraceae\_OTU096  
 998 ATGAACGCTGGCGGCGTGCTTAACACATGCAAGTCGAGCGAAGCATAGATGT  
 999 GGAAGTTTTTCGGATGGAAGCGTGTATGACTGAGCGGCGGACGGGTGAGTAAC  
 1000 GCGTGGGTAACCTGCCTCATAACAGGGGGATAACAGTTAGAAATGACTGCTAA  
 1001 TACCGCATAAGCGCACAGGACCGCATGGTCCGGTGTGAAAAAACTCCGGTGG  
 1002 TATGAGATGGACCCGCGTCTGATTAGCTGGTTGGTGAGGTAACGGCCCACCA  
 1003 AGGCGACGATCAGTAGCCG  
 1004 > Unclassified Lachnospiraceae\_OTU110  
 1005 ATGAACGCTGGCGGCGTGCTTAACACATGCAAGTCGAACGAAGCACCCTTTT  
 1006 AGATTTTCCTTCGGGGAAGAAGAAATTGTGACTGAGTGGCGGACGGGTGAGTA  
 1007 ACGCGTGGGCAACCTGCCCCATAACAGGGGGATAACAGCCGGAAACGGCTGCT  
 1008 AAAACCGCATAAGCGCACAAAGGGCCGCATGGCCTGGTGTGAAAAAACTCCGGT  
 1009 GGTATGGGATGGGCCCGCGTCTGATTAGCTAGTTGGCGGGGGAGAGGCCAC  
 1010 CAAGGCGACGATCAGTAGCCG  
 1011 > Unclassified Lachnospiraceae\_OTU113  
 1012 TTGAACGCTGGCGGCAGGCCTAACACATGCAAGTCGAACGGTAACAGGAAG  
 1013 CAGCTTGCTGCTTTGCTGACGAGTGGCGGACGGGTGAGTAATGTCTGGGAAA  
 1014 CTGCCTGATGGAGGGGGATAACTACTGGAAACGGTAGCTAATACCGCATAAC  
 1015 GTCGCAAGACCAAAGAGGGGGACCTTAGGGCCTCTTGCCATCGGATGTGCC  
 1016 AGATGGGATTAGCTAGTAGGTGGGGTAACGGCTCACCTAGGCGACGATCCCT  
 1017 AGCTG  
 1018 > Unclassified Lachnospiraceae\_OTU128  
 1019 ACGAACGCTGGCGGCATGCCTAACACATGCAAGTCGAACGAGGTAGAAATA  
 1020 CCTAGTGGCGGACGGGTGCGTAACACGTGAGCAACCTGCCTCTTACAACGGG  
 1021 ATAACACAGAGAAATTTGTGCTAATACGGTATGAGACTACGAGATGGCATCA  
 1022 TCTAGTGGTTAAAGTTCAGGCGGTAAGAGAGGGGGCTCGCGGCCCATTAGATA  
 1023 GTTGGTGAGGTAACGGCTCACCAAGTCGACGATGGGGTAGCCG  
 1024 > Unclassified Lachnospiraceae\_OTU130  
 1025 ATGAACGCTGGCGGCGTGCTTAACACATGCAAGTCGAACGAAGCACTTAAGA  
 1026 CGGATTACTTCGGTTTGAAGTCTTATTTGACTGAGTGGCGGACGGGTGAGTAA  
 1027 CGCGTGGGTAACCTGCCTCATAACAGGGGGATAACAGTTAGAAATGACTGCTA  
 1028 ATACCGCATAAGCGCACGGTCTCGCATGGGACGGTGTGAAAAAACTCCGGTGG  
 1029 TATGAGATGGACCCGCGTCTGATTAGCTGGTTGGCGAGGTAAGGGCTCACCA  
 1030 AGGCGACGATCAGTAGCCG  
 1031 > Unclassified Lachnospiraceae\_OTU137  
 1032 ACGAACGCTGGCGGCGTGCTTAATACATGCAAGTCGAGCGAACTGATGAAGA  
 1033 GCTTGCTTTTGATCAGTTAGCGGCGGACGGGTGAGTAACACGTGGGTAACCT  
 1034 GCCTGTAAGACTAGGATAACTCCGGGAAACCGGGGCTAATACTGGATAACTT  
 1035 TTCTCTCCGCATGGAGAGAGATTGAAAGATGGCTTCGGCTATCACTTACAGAT  
 1036 GGACCCGCGGCGCATTAGCTAGTTGGTGAGGTAACGGCTCACCAAGGCAACG  
 1037 ATGCGTAGCCG

1038 > Unclassified Lachnospiraceae\_OTU139  
1039 ATGAACGCTGGCGGCGTGCCTAACACATGCAAGTCGAACGGAAGTGCATT  
1040 TTGAAGCAATTAGCTTGCTAAGGGTGGAAATGTTGGCAGTTTAGTGGCGGAC  
1041 GGGTGAGTAACGCGTGGGTAACTGCCTTACACAGGGGGATAACACCTGGAA  
1042 ACAGGTGCTAATACCGCATAACAGGAAGAGGCGCATGCCACTTCTTGAAAA  
1043 CTCCGGTGGTGTAAAGATGGACCCGCGTCTGATTAGCTAGTTGGCGGGGTAAC  
1044 GGCCACCAAGGCGACGATCAGTAGCCG  
1045 > Unclassified Lachnospiraceae\_OTU142  
1046 ATGAACGCTGGCGGCGTGCCTAACACATGCAAGTCGAACGAAGCGCCTGCTT  
1047 TGAATTCCTTCGGGAAGGAGAGGCCTGCGACTGAGTGGCGGACGGGTGAGTA  
1048 ACGCGTGGGCAACCTGCCCGCACTGGGGGACAACAGCTGGAAACGGCTGCT  
1049 AATACCGCATAAGCGCACAGCTTCGCATGAAGCGGTGTGAAAACTCCGGTG  
1050 GTGCGGGATGGGCCCGCGTCTGATTAGCTGGTTGGCGGGGTAACGGCCACC  
1051 AAGGCAACGATCAGTAGCCG  
1052 > Unclassified Lachnospiraceae\_OTU144  
1053 ACGAACGCTGGCGGCGTGCCTAACACATGCAAGTCGAACGGAGCTATGCGCT  
1054 GAACGGAGAGCAGCTTGCTGGAAGGAAGTTCTTGTATAGCTTAGTGGCGGAC  
1055 GGGTGAGTAACGCGTGAGCAACCTGCCTTTCAGAGGGGGATAACGTTTGGAA  
1056 ACGAACGCTAATACCGCATAAGACCACACTTCCACATGGGAGAGGGGTCAA  
1057 GGAGCAATCCGCTGAAAGATGGGCTCGCGTCCGATTAGATAGTTGGGGGGT  
1058 AACGCCACCAAGTCGACGATCGGTAGCCG  
1059 > Unclassified Lachnospiraceae\_OTU159  
1060 ACGAACGCTGGCGGCGTGCCTAACACATGCAAGTCGAACGGAAGTATAGTTGA  
1061 AGGAATTCTTCGGAAGGACATTGGTTAAGTTTAGTGGCGGACGGGTGAGTAA  
1062 CGCGTGAGTAACCTGCCTCCGAGAGGGGAATAACAATCTGAAAAGATTGCTA  
1063 ATACCGCATAACATAGCGAAGTCGCATGGCAGCGCTATCAAAGATTTATCGC  
1064 TCGGAGATGGACTCGCGTCCGATTAGTTAGTTGGTGAGGTAACGGCTCACCA  
1065 AGACCGCGATCGGTAGCCG  
1066 > Unclassified Lachnospiraceae\_OTU164  
1067 ATGAACGCTGGCGGCGTGCCTAACACATGCAAGTCGAACGAAGCGATCGAGA  
1068 GGAAGTTTTCGGATGGAATCCGGATTGACTGAGTGGCGGACGGGTGAGTAAC  
1069 GCGTGGGTAACCTGCCTCATAAGGGGGATAACAGTTAGAAATGACTGCTAA  
1070 TACCGCATAAGCGCACAGGGACACATGTTCCGGTGTGAAAACTCCGGTGGT  
1071 ATGAGATGGACCCGCGTCTGATTAGCTGGTTGGCGGGGTAACGGCCACCAA  
1072 GGCGACGATC  
1073 > Unclassified Lachnospiraceae\_OTU187  
1074 ATGAACGCTGGCGGCGTGCCTAACACATGCAAGTCGAACGGGGTTATTTAGG  
1075 AAATTTCTTCGGGAATGGAATCTTTAACCTAGTGGCGGACGGGTGAGTAA  
1076 CGCGTGAGCAATCTGCCTTCGGATGGGGGATAACAGCCGGAAACGGCTGCTA  
1077 ATACCGCATAACACATGGGATCCGCATGTTTCTATGTCAAAGATTTATCGTC  
1078 CGGAGATGAGCTCGCGTCTGATTAGCTGGTTGGCGGGGTAACGGCCACCAA  
1079 GGCGACGATCAGTAGCCG  
1080 > Unclassified Lachnospiraceae\_OTU188  
1081 ATGAACGCTGGCGGCGTGCCTAACACATGCAAGTCGAACGGAGTATGAATTT  
1082 GGATTTCTCACGATTGAAGAGTTCATACTTAGTGGCGGACGGGTGAGTAACG  
1083 CGTGGATAACCTGCCCATACCGGGGGATAACAGCCGGAAACGGCTGCTAAT

1084 ACCGCATAAGCGCACGGGACTGCATGGCCCTGTGTGAAAACTCCGGTGGTA  
1085 TGGGATGGATCCGCGTCTGATTAGCTAGTTGGTGAGATAAAAGCCCACCAAG  
1086 GCGACGATCAGTAGCCG  
1087 > Unclassified Lachnospiraceae\_OTU191  
1088 ACGAACGCTGGCGGCGTGCCTAACACATGCAAGTCGAACGGAGCTAGATGCT  
1089 GAGGACGTAGCTTGCTATTGAATCTTGTTTAGCTTAGTGGCGGACGGGTGAGT  
1090 AACGCGTGAGCAACCTACCTTTCAGAGGGGGATAACGTTTGGAAACGAACGC  
1091 TAATACCGCATGATATTATTGGGCAGCATTGCCTGATAATCAAAGGAGCAAT  
1092 CCGCTGAAAGATGGGCTCGCGTCCGATTAGGTAGTTGGCGGGGTAACGGCCC  
1093 ACCAAGCCGACGATCGGTAGCCG  
1094 > Unclassified Lachnospiraceae\_OTU203  
1095 ACGAACGCTGGCGGCGTGCCTCAAACATGCAAGTCGAACGGAGTTAATTTAG  
1096 CTTGCTAAATTAAGTTAGTGGCGGACTGGTGAGTAACGCGTGAGTAATCTGC  
1097 CTATTACAGGGGGATAACAGTTGGAAACGACTGCTAATACCGCATAAGACCA  
1098 CGGGAAGGCATCTTCAAGGGGTCAAAGGGATACTGGTAATAGATGAGCTTGC  
1099 GTATCATTAGCTAGATGGTGAGGGTAAAGGCCACCATGGCGACGATGATTA  
1100 GCCG  
1101 > Unclassified Lachnospiraceae\_OTU207  
1102 ACGAACGCTGGCGGCGTGCCTAACACATGCAAGTCGAACGGGGCGAAGGGA  
1103 GCTTGCTCCTGGAGCCTAGTGGCGGACGGGTGAGTAACGCGTGAGTAACCTG  
1104 CCTTTCAGAGGGGGATAACATTCTGAAAAGGATGCTAATACCGCATAAAGTC  
1105 AGAGTGTTCGCATGGCGCACTGACCAAAGGAGCAATCCGCTGAAAGATGGACT  
1106 CGCGTCCGATTAGCTAGTTGGCGGGGTAAAGGCCACCAAGGCGACGATCGG  
1107 TAGCCG  
1108 > Unclassified Lachnospiraceae\_OTU211  
1109 ATGAACGCTGGCGGCGTGCCTAACACATGCAAGTCGAACGAAGCGTTCCGGA  
1110 GGAAGTTTTTCGGATGGAATCTGGGATGACTGAGTGGCGGACGGGTGAGTAAC  
1111 GCGTGGGTAACCTGCCCTGTACTGGGGGACAACAGTTAGAAATGACTGCTAA  
1112 TACCGCATAAAGCGCACAGGACCGCATGGTCCGGTGTGAAAACTCCGGTGGT  
1113 ACAGGATGGACCCGCGTCTGATTAGGTAGTTGGCGGGGTAAACGGCCCACCAA  
1114 GCCGACGATCAGTAGCCG  
1115 > Unclassified Lachnospiraceae\_OTU213  
1116 GCGAACGCTGGCGGCGTGCCTAACACATGCAAGTCGAACGGAGCACCTTGA  
1117 AAGAGATTTTCGGTCAATGGATAGGAATGCTTAGTGGCGGACGGGTGAGTAAC  
1118 GCGTGAGGAACCTGCCTTTCAGAGGGGGACAACAGCTGGAAACGGCTGCTAA  
1119 TACCGCATAACACATAGGTGTCGCATGGCATTATGTCAAAGATTTATCGCTG  
1120 AGAGATGGCCTCGCGTCTGATTAGCTAGTTGGTAGGGTAACGGCCTACCAAG  
1121 GCGACGATCAGTAGCCG  
1122 > Unclassified Lachnospiraceae\_OTU215  
1123 ATGAACGCTGGCGGCATGCCTAATACATGCAAGTCGAACGGACGGAAAGGA  
1124 AGCTTGCTTTCTGGAAGTCAGTGGCGAACGGGTGAGTAACACGTAGGTAACC  
1125 TGGCCATCACAGGGGGATAACTACTGGAAACGGTAGCTAAAACCGCATAGGT  
1126 AAGGAAGAGGCATCTCTTGCTTATTAAGGGGCTACGGCCTTGGTGATGGAT  
1127 GGACCTGCGGCGCATTAGCTAGTTGGTGAGGTAGAGGCTACCAAGGCGATG  
1128 ATGCGTAGCCG  
1129 > Unclassified Lachnospiraceae\_OTU221

1130 ATGAACGCTGGCGGGCGTGCCTAACACATGCAAGTCGAACGGACATAATTTGA  
1131 AACCTAGTGAGAATTATGTTAGTGGCGGACGGGTGAGTAACGCGTGGGTAAC  
1132 CTGCCCCATACCGGGGATACCAGCCGGAACGGCTGCTAATACCGCATAAG  
1133 CGCACAGCTTTGCATGAAGCAGTGTGAAAACTCCGGTGGTATGGGATGGAC  
1134 CCGCGTCCGATTAGCCAGTTGGCGGGGTAGAGGCCACCAAAGCGACGATCG  
1135 GTAGCCG  
1136 > Unclassified Lachnospiraceae\_OTU225  
1137 ATGAACGCTGGCGGGCGTGCCTAACACATGCAAGTCGAGCGATTTACTTCGGT  
1138 AAAGAGCGGCGGACGGGTGAGTAACGCGTGGGTAACCTGCCCTATACACAC  
1139 GGATAACATAACGAAAGGTATGCTAATACGAGATAAAATACTTTTATCGCAT  
1140 GGTAGAAGTATCAAAGCTTTTGGCGGTACAGGATGGACCCGCGTCTGATTAGC  
1141 TAGTTGGTAAGGTAACGGCTTACCAAGGCGACGATCAGTAGCCG  
1142 > Unclassified Lachnospiraceae\_OTU229  
1143 ACGAACGCTGGCGGGCGCGCTAACACATGCAAGTCGAACGAAGGGAAGGGG  
1144 GCTTGCCCCCTGAACCTTAGTGGCGGACGGGTGAGTAACACGTGAGCAACCTG  
1145 CCCTATAGAGGGGGATAACGTTTGGAAACGAACGCTAATACCGCATAACGCG  
1146 CTGGGGGGACATCCCTTTGGCGCCAAGGAGCAATCCGCTATAGGATGGGCT  
1147 CGCGTCCGATTAGATAGTTGGCGGGGTAACGGCCCACCAAGTCGACGATCGG  
1148 TAGCCG  
1149 > Unclassified Lachnospiraceae\_OTU230  
1150 ATGAACGCTGGCGGGCGTGCCTAACACATGCAAGTCGAGCGAAGCGGTTGTGC  
1151 GGAATTTTTTCGGAAGGAAGCATAGCTGACTGAGCGGCGGACGGGTGAGTAAC  
1152 GCGTGGATAACCTGCCTCATAACAGGGGGATAACAGTTAGAAATGACTGCTAA  
1153 TACCGCATAAGCGCACAGAGATGCATGTCTCGGTGTGAAAAGCTGAGGCGGT  
1154 ATGAGATGGATCCGCGTCTGATTAGCTGGTTGGCGGGGTAGAGGCCACAAG  
1155 GCGACGATCAGTAGCCG  
1156 > Unclassified Lachnospiraceae\_OTU233  
1157 ATAAACGCTGGCGGGCGCACATAAAGACATGCAAGTCGAACGAACCTTAACATCAT  
1158 TCTTTTAGATTGAGAGCGGTTAGTGGCGGACTGGTGAGTAACGCGTAAGGAA  
1159 CCTGCCTTTTAGAGGGGAATAACAATGAGAAATCATTGCTAATACCGCATAT  
1160 GCCATAGTTATCACATGATAATAGTGGGAAAGGAGCAATTCGCTAAAAGATG  
1161 GCCTTGCCTCTGATTAGATAGTTGGTAAGGTAACGGCTTACCAAGTCGACGA  
1162 TCAGTAGCCG  
1163 > Unclassified Lachnospiraceae\_OTU234  
1164 TTGAACGCTGGCGGCAGGCCCTAACACATGCAAGTCGAGCGGTAGAGAGAAG  
1165 CTTGCTTCTCTTGAGAGCGGCGGACGGGTGAGTAATGCCTAGGAATCTGCCT  
1166 GGTAGTGGGGGATAACGTTTCGGAAACGGACGCTAATACCGCAATACGTCCTA  
1167 CGGGAGAAAGCAGGGGACCTTCGGGCCTTGCCTATCAGATGAGCCTAGGTC  
1168 GGATTAGCTAGTTGGTGAGGTAATGGCTCACCAAGGCGACGATCCGTAACCTG  
1169 > Unclassified Lachnospiraceae\_OTU238  
1170 ATGAACGCTGGCGGGCGTGCCTAACACATGCAAGTCGAACGAAGCGCTATAGT  
1171 TGGATTCTTCGGAAAAAGAGTATAGTACTGAGTGGCGGACGGGTGAGTAAC  
1172 GCGTGGGCAACCTGCCCCATACAGGGGGATAACAGTTAGAAATGACTGCTAA  
1173 TACCGCATAAGCGCACGGCAACGCATGTTGCTGTGTGAAAACTCCGGTGGT  
1174 ATGGGATGGACCCGCGTCTGATTAGCCAGTTGGCAGGGTAACGGCCTACCAA  
1175 AGCGACGATCAGTAGCCG

1176 > Unclassified Lachnospiraceae\_OTU239  
1177 ATGAACGCTGGCGGCGTGCCTAACACATGCAAGTCGAGCGAAGCACTATAAT  
1178 TGGAAGCCTACGGGAAGAAGAATATAGTGACTGAGCGGGCGGACGGGTGAGT  
1179 AACGCGTGGGCAACCTGCCTTGCACAGGGGGATAACAGTTAGAAATGACTGC  
1180 TAATACCGCATAAAGACCACAGCCCCGCATGGGGCGGAGGTAAAACCGAGG  
1181 TGGTGCAAGATGGGCCCGCGTCTGATTAGGCAGTTGGTGGGTAACGGCCAC  
1182 CAAACCGACGATCAGTAGCCG  
1183 > Unclassified Lachnospiraceae\_OTU240  
1184 ATGAACGCTGGCGGCGTGCCTAACACATGCAAGTCGAGCGAAGCAATTAAGA  
1185 GGAAGTTTTCGGATGGAATGTTAATTGACTGAGCGGCGGACGGGTGAGTAAC  
1186 GCGTGGGTAACCTGCCTCATAACAGGGGGATAACAGTTAGAAATGACTGCTAA  
1187 TACCGCATAAGCACACAGAACCGCATGGTTCGGGGTGAAAAGCCGAGACGG  
1188 TATGAGATGGACCCGCGTCTGATTAGCTAGTTGGAGGGGTAACGGCCACCA  
1189 AGGCAACGATCAGTAGCCG  
1190 > Unclassified Lachnospiraceae\_OTU260  
1191 ATGAACGCTGGCGGCGTGCCTAACACATGCAAGTCGAACGAAGCGCTGGGA  
1192 GCGGAACATTTGCGGTGGGAAGCATCCAATGACTGAGTGGCGGACGGGTGAGT  
1193 AACGCGTGGGTAACCTGCCTCATAACAGGGGGATAACAGCCAGAAATGACTGC  
1194 TAATACCGCATAAAGCGCACGGAACCGCATGGTTTTGTGTGAAAACCTCCGGT  
1195 GGTATGAGATGGACCCGCGTCTGATTAGCTAGTTGGCGGGGTAACGGCCAC  
1196 CAAGGCAGCGATCAGTAGCCG  
1197 > Unclassified Lachnospiraceae\_OTU262  
1198 ATGAACGCTGGCGGCGTGCCTAACACATGCAAGTCGAACGATTAAGCCGGCT  
1199 TCGGCCGGGCATAGAGTGGCGAACGGGTGAGTAACACGTGACCAACCTGCCC  
1200 CTTGCTCCGGGACAACCGCTGGAAACGGCGGCTAATACCGGATACTCCGCGG  
1201 GCCCCGCATGGGGCCGGCGGGAAAGCCCCGACGGCAAGGGATGGGGTCGC  
1202 GGCCATTAGGTAGTAGGCGGGGGTAACGGCCACCTAGCCCAGCGATGGGTA  
1203 GCCG  
1204 > Unclassified Lachnospiraceae\_OTU267  
1205 ACGAACGCTGGCGGCGTGCCTAACACATGCAAGTCGAACGGAAAGGCCCTGC  
1206 TTTTGTGGGGTGCTCGAGTGGCGAACGGGTGAGTAACACGTGAGTAACCTGC  
1207 CCTTGACTTTGGGATAACTTCAGGAAACTGGGGCTAATACCGGATAGGAGCT  
1208 CCTGCTGCATGGTGGGGGTTGGAAAGTTTCGGCGGTTGGGGATGGACTCGCG  
1209 GCTTATCAGCTTGTGGTGGGGTAGTGGCTTACCAAGGCTTTGACGGTAGCCG  
1210 > Unclassified Lachnospiraceae\_OTU285  
1211 ATGAACGCTGGCGGCGTGCCTAACACATGCAAGTCGAGCGAAGCATTGACG  
1212 CGAAGTTTTCGGATGGAACGTTGAATGACTGAGCGGCGGACGGGTGAGTAAC  
1213 GCGTGGGTAACCTGCCTTATAACAGGGGGATAACAGTTAGAAATGACTGCTAA  
1214 TACCGCATAAAGCGCACAGTACCGCATGGTACGGTGTGAAAACCTCCGGTGGT  
1215 ATAAGATGGACCCGCGTCTGATTAGCCAGTTGGCGGGGTAACGGCCACCAA  
1216 AGCGACGATCAGTAGCCG  
1217 > Unclassified Lachnospiraceae\_OTU289  
1218 ATGAACGCTGGCGGCGTGCCTAACACATGCAAGTCGAACGGGGATGCCATTT  
1219 TTGAAGCGATTAGCTTGCTGAGAGTGGAAATGTTGGCATCTTAGTGGCGGAC  
1220 GGGTGAGTAACGCGTGGGCAACCTGCCCTGCACAGGGGGACAACAGCCGGA  
1221 AACGGCTGCTAATACCGCATAAAGCGCACAGCTTCGCATGAAGCGGTGCGAAA

1222 AGCTTTGGCGGTGCAGGATGGGGCCCGCGTCTGATTAGCTTGTTGGCGGGGC  
1223 AACGGCCCACAAGGCGACGATCAGTAGCCG  
1224 > Unclassified Lachnospiraceae\_OTU292  
1225 ATGAACGCTGGCGGCGTGCCTAACACATGCAAGTCGAGCGAAGCACATAAA  
1226 AATGGAATCTTCGGATGAAGCTTTATGTGACTGAGCGGCGGACGGGTGAGTA  
1227 ACGCGTGGGCAACCTGCCTTACACAGGGGGATAACAGTTAGAAATGACTGCT  
1228 AATACCGCATAAGACCGCAGGACTGCATGGTCCGGTGGTAAAAACTCCGGTG  
1229 GTGTAAGATGGGCCCGCGTCTGATTAGGTAGTTGGCGGGGCAGCGGCCACC  
1230 AAGGCGACGATCAGTAGCCG  
1231 > Unclassified Lachnospiraceae\_OTU294  
1232 ATGAACGCTGGCGGCGTGCCTAACACATGCAAGTCGAACGGAGCACCCCTGA  
1233 CGGAGTTTTTCGGACAACCTGAAGGGACTGCTTAGTGGCGGACGGGTGAGTAAC  
1234 GCGTGAGCAACCTGCCTTGGAGTGGGGAATAACAGCTGGAAACAGCTGCTAA  
1235 TACCGCATGATATGTCTGTATCACATGGTACTGGACATCAAAGATCTATCGCT  
1236 CTGAGATGGGCTCGCGTCTGATTAGCTAGTTGGTGGGGCAACGGCCCCACCA  
1237 GGCGACGATCAGTAGCCG  
1238 > Unclassified Lachnospiraceae\_OTU306  
1239 ATGAACGCTGGCGGCATGCCTAACACATGCAAGTCGAACGAGGATAGCAATA  
1240 TCCTAGTGGCGAACGGGTGAGTAACGCGTGGGCAACCTGCCTCATAACAACGG  
1241 GATACCCGAGGGAAACTTCGGTTAATACGGTATAAGACCACACTACCGCATG  
1242 GTAGAGGGTAAAGAGAAATCCGGTATGAGATGGGCTCGCGTCGCATTAGGCT  
1243 AGTTGGTGGGTAACGGCCCACCAAGGCGACGATGCGTAGCCG  
1244 > Unclassified Lachnospiraceae\_OTU322  
1245 ATGAACGCTGGCGGCGTGCCTAACACATGCAAGTCGAACGGAGCACCCCTGA  
1246 AGGAGTTTTTCGGACAACCTGATGGGAATGCTTAGTGGCGGACGGGTGAGTAAC  
1247 GCGTGAGCAACCTGCCTTGGAGTGGGGAATAACAGCTGGAAACAGCTGCTAA  
1248 TACCGCATAATATGTCTGAACCGCATGGCTCTGGACATCAAAGATTTATCGCT  
1249 CTGAGATGGACTCGCGTCTGATTAGCTAGTTGGCGGGCAACGGCCCCACCAAG  
1250 GCGACGATCAGTAGCC  
1251 > Unclassified Lachnospiraceae\_OTU328  
1252 ACGAACGCTGGCGGCGTGCCTAACACATGCAAGTCGAACGGGACTTGGCCCT  
1253 TCGGGGACAAGTTTAGTGGCGGACGGGTGAGTAACGCGTGAGCAACCTGCCT  
1254 TTCAGAGGGGGACAACAGTTGGAACGACTGCTAATACCGCATGATACTTTT  
1255 AGGAGGCATCTCCAAAAAGTCAAAGATTTATCGCTGAAAGATGGGCTCGCGT  
1256 CTGATTAGATAGTTGGTGGGTAACGGCCTACCAAGTCAACGATCAGTAGCCG  
1257  
1258 >Unclassified Runinococcaceae\_OTU056  
1259 ACGAACGCTGGCGGCGTGCCTAACACATGCAAGTCGAACGGAGTACCCTCGA  
1260 AAGAGATTTTCGGTCAATGGAGAGGACTACTTAGTGGCGGACGGGTGAGTAAC  
1261 GCGTGAGGAACCTGCCTTTCAGTGGGGGACAACAGTTGGAAACGACTGCTAA  
1262 TACCGCATAACGTACGGGTATCGCATGGTACTGGTACCAAAGATTTATCGCT  
1263 GAGAGATGGCCTCGCGTCTGATTAGCTAGTTGGTAGGGTAACGGCCTACCAA  
1264 GGCGACGATCAGTAGCCG  
1265 > Unclassified Runinococcaceae\_OTU082  
1266 ATGAACGCTGGCGGCACGCCTAACACATGCAAGTCGAACGGAGTGAAGATG  
1267 CTCGCATCTGAACTTAGTGGCGGACGGGTGAGTAACACGTGAGCAACCTGCC

1268 TTTCAGAGGGGGATAACGTTTGGAAACGAACGCTAATACCGCATAAAAATATC  
1269 GGAGTCGCATGGCACTGATATCAAAGGAGCAATCCGCTGAAAGATGGGCTCG  
1270 CGTCCGATTAGGCAGTTGGCGGGGTAACGGCCACCAAACCGACAATCGGTA  
1271 GCCG  
1272 > Unclassified Runinococcaceae\_OTU086  
1273 ATGAACGCTGGCGGGCGTGCCTAACACATGCAAGTCGAACGAAGCGCTACCGG  
1274 CGGAACCTTTTCGGAGGGAAGATGGTAATGACTGAGTGGCGGACGGGTGAGTA  
1275 ACGCGTGGGTAACCTGCCTCACAGAGGGGGACAACAGCCGGAAACGGCTGC  
1276 TAATACCGCATAACAAGGGATTGCCGCATGACGATCCTTTCAAAGATTTATC  
1277 GCTGTGAGATGGACCCGCGTCTGATTAGCTTGTGGTGGGGTAACGGCCTAC  
1278 CAAGGCGACGATCAGTAGCCG  
1279 > Unclassified Runinococcaceae\_OTU094  
1280 ATGAACGCTGGCGGGCGTGCCTAACACATGCAAGTCGAACGGAGTACCCCTGA  
1281 AGGAGTTTTTCGGACAACCTGATGGGACTACTTAGTGGCGGACGGGTGAGTAAC  
1282 GCGTGAGTAACCTGCCTTGGAGTGGGGAATAACAGCTGGAAACAGCTGCTAA  
1283 TACCGCATAATATGTCTGTGTCGCATGGCACTGGACATCAAAGATTTATCGCT  
1284 CTGAGATGGACTCGCGTCTGATTAGCTAGTTGGCGGGTAACGGCCACCAA  
1285 GCGACGATCAGTAGCCG  
1286 > Unclassified Runinococcaceae\_OTU116  
1287 ATGAACGCTGGCGGGCGTGCCTAACACATGCAAGTCGAACGGGGCACCCCAA  
1288 AGGAGTTTTTCGGACAACCTGCGGGGAATGCCTAGTGGCGGACGGGTGAGTAAC  
1289 GCGTGAGCAACCTGCCTTGGAGTGGGGAATAACAGATGGAAACATCTGCTAA  
1290 TACCGCATGATGCAGTTGGGCCACATGGCTCTGACTGCCAAAGATTTATCGCT  
1291 CTGAGATGGGCTCGCGTCTGATTAGCTAGTTGGCGGGGCAACGGCCACCAA  
1292 GGCGACGATCAGTAGCCG  
1293 > Unclassified Runinococcaceae\_OTU125  
1294 ACGAACGCTGGCGGGCGTGCCTAACACATGCAAGTCGAACGGAGATACGCGCT  
1295 GAATGACGAAGCTTGCTTTTGAATTCTTGTGTATCTTAGTGGCGGACGGGTGA  
1296 GTAACGCGTGAGCAACCTGCCTTTCAGAGGGGGATAACGTTTGGAAACGAAC  
1297 GCTAATACCGCATGAGACTACAGTACTACATGGTACAGTGGCCAAAGGAGCA  
1298 ATCCGCTGAAAGATGGGCTCGCGTCCGATTAGATAGTTGGCGGGGTAACGGC  
1299 CCACCAAGTCGACGATCGGTAGCCG  
1300 > Unclassified Runinococcaceae\_OTU129  
1301 ACGAACGCTGGCGGGCGTGCCTAACACATGCAAGTCGAACGGGACTATCTCGG  
1302 AAGAAGTTTTTCGGATGGATTTTGGGATAGTTTAGTGGCGGACGGGTGAGTAA  
1303 CACGTGAGCAACCTGCCTTTCGAGAGGGGAATAACGGCTGGAAACGGTCGCTA  
1304 ATACCGCATAACGTACGGATGGGACATCCTGTCTGTACCAAAGATTTATCGCT  
1305 CGAAGATGGGCTCGCGTCCGATTAGGTAGTTGGTGAGGTAACGGCCACCAA  
1306 GCCGACGATCGGTAGCCG  
1307 > Unclassified Runinococcaceae\_OTU174  
1308 ATGAACGCTGGCGGGCGTGCCTAACACATGCAAGTCGAACGGAGCGCGTGAG  
1309 AGCGAACATTTTCGGTGGGAGCATTCGCGCAGCTTAGTGGCGGACGGGTGAGT  
1310 AACGCGTGGACAATCTGCCGCGCACAGGGGAATAACAGCCGGAAACGGCTG  
1311 CTAATGCCGCATATGCGCGCAGCGTTCGCATGACGCAGCGCGGAAAGCAATTT  
1312 GCGGTGCGCGATGAGTCCGCGTCCGATTAGGCAGTTGGCGGGGTGACGGCCC  
1313 ACCAAACCGACGATCGGTAGCCG

1314 > Unclassified Runinococcaceae\_OTU182  
1315 ACGAACGCTGGCGGCGTGCCTAATACATGCAAGTCGAACGGAGATATACGCT  
1316 GAAGATTTAGCTTGCTATTGATTCTTGTATATCTTAGTGGCGGACGGGTGAGT  
1317 AACGCGTGAGCAACCTGCCTTTCAGAGGGGGATAACGTTTGGAAACGAACGC  
1318 TAATACCGCATGACATTATTGAGCTGCATGGCTTGATAATCAAAGGAGCAAT  
1319 CCGCTGAAAGATGGGCTCGCGTCCGATTAGGTAGTTGGTGAGGTAACGGCCC  
1320 ACCAAGCCGACGATCGGTAGCCG  
1321 > Unclassified Runinococcaceae\_OTU185  
1322 ATGAACGCTGGCGGCGTGCATAACACATTCAAGTCGAACGGAGTTAATTGGA  
1323 AGCTTGCTTCTGATTAACCTTAGTGGCGGACGGGTGAGTAACGCGTGAGCAAC  
1324 CTGCCTGTTAGAGGGGAATAACGTCTGGAAACGGACGCTAATACCGCATAAC  
1325 GCATTGAGGCCGCATGGTATTAATGCCAAAGATTTATCGCTAACAGATGGGC  
1326 TCGCGTCCGATTAGGTAGTTGGTGAGGTAACGGCCCACCAAGCCGACGATCG  
1327 GTAGCCG  
1328 > Unclassified Runinococcaceae\_OTU197  
1329 ATGAACGCTGGCGGCACGCTTAACACATGCAAGTCGAGCGAGAGAGTTTTGC  
1330 GGAAAGGCTTCGGCCTGGAAGGGAAATGATCTAGCGGCGGACGGGTGAGTA  
1331 ACACGTGGGTAACCTACCCTATACAGGGGGATAACGTATAGAAATGTACGCT  
1332 AATACCGCATAAGCCTACAGGTTTCGCATGAACTAGTAGGAAAAGCCGAGACG  
1333 GTATAGGATGGGCCCGCGACTGATTAGCTAGTTGGGGAGGTAAGGCTTACC  
1334 AAGGCAACGATCAGTAGCCG  
1335 > Unclassified Runinococcaceae\_OTU245  
1336 ATGAACGCTGGCGGCGTGCCTTAACACATGCAAGTCGAACGGGGATGTAAGAA  
1337 GCTTGCTTTTTGCATCTTAGTGGCGGACGGGTGAGTAACGCGTGGATAACCTG  
1338 GCCATAACAGGGGGATAGCAGCTGGAAACGGCTGGTAATACCGCATAAGCG  
1339 CACAGTGCTGCATGGCACAGTGTGAAAACTCCGGTGGTATGGGATGGGTCC  
1340 GCGTCTGATTAGGCAGTTGGCGGGGTAAAGGCCACCAAACCGACGATCAGT  
1341 AGCCG  
1342 > Unclassified Runinococcaceae\_OTU261  
1343 ATGAACGCTAGCGACAGGCCTAACACATGCAAGTCGAGGGGCATCGGGGCG  
1344 AGGAGCAATCCTTGCCGCCGGCGACCGGCGCACGGGTGAGTAACGCGTATGC  
1345 GACCTGCCCCGTTGCAGGGGGATAATCGGGAGAAATCCCGTCTAATACAGCAT  
1346 GACGCCGGGAAGGGACATCCCTTTCGGCCAAAGGGGGCGACTCCGGTCACG  
1347 GATGGGCATGCGGCGCATTAGGTAGTTGGTGGGGCAACGGCCCACCAAGCCG  
1348 ACGATGCGTAGGGG  
1349 > Unclassified Runinococcaceae\_OTU293  
1350 TTGAACGCTGGCGGCAGGCCTAACACATGCAAGTCGAGCGGTAGCACAGAG  
1351 AGCTTGCTCTCGGGTGACGAGCGGCGGACGGGTGAGTAATGTCTGGGAAACT  
1352 GCCTGATGGAGGGGGATAACTACTGGAAACGGTAGCTAATACCGCATAATGT  
1353 CGCAAGACCAAAGTGGGGGACCTTCGGGCCTCATGCCATCAGATGTGCCAG  
1354 ATGGGATTAGCTAGTAGGTGGGGTAACGGCTCACCTAGGCGACGATCCCTAG  
1355 CTG  
1356 > Unclassified Runinococcaceae\_OTU312  
1357 ATGAACGCTGGCGGCGTGCCTAACACATGCAAGTCGAACGAAGCGCTTTTCC  
1358 CGAATTTTCGGAGGAGGGGAGAGTGAAGTGGCGGACGGGTGAGTAACG  
1359 CGTGGGGAACCTGCCCTGTACCGGGGGATAACAGCCGGAAACGGCTGCTAAT



1360 ACCGCATAAGCGCACAGTGCCGCATGGCACGGTGTGAAAAACCACGGTGGTA  
1361 CAGGATGGCCCCGCGTCTGATTAGTTGGTTGGCAGGGTAACGGCCTACCAAG  
1362 ACGGCGATCAGTAGCCG  
1363  
1364 >Unclassified Tenericutes\_OTU002  
1365 ATGAACGCTGGCGGCATGCCTAATACATGCAAGTCGAACGGATATCTTCGGA  
1366 TATGAGTGGCGAACGGGTGAGTAACACGTAGGGAACCTGCCTGCATGAGCGG  
1367 GAGA ACTTCTGGAAACGGAAGCTGATACCGGATGAGCAAAGAGGAGGCATC  
1368 TTCTTTTGGAAAAGGGGACAAGAGTCCC GCATGCAGATGGACCTGCGGTGC  
1369 ATTAGCTGGTTGGAGAGGTAACGGCT

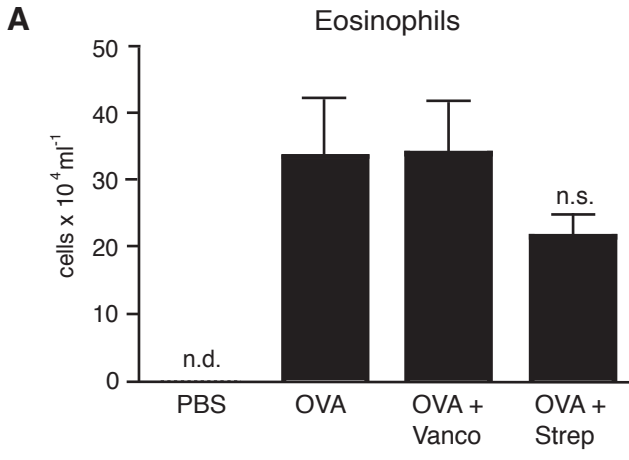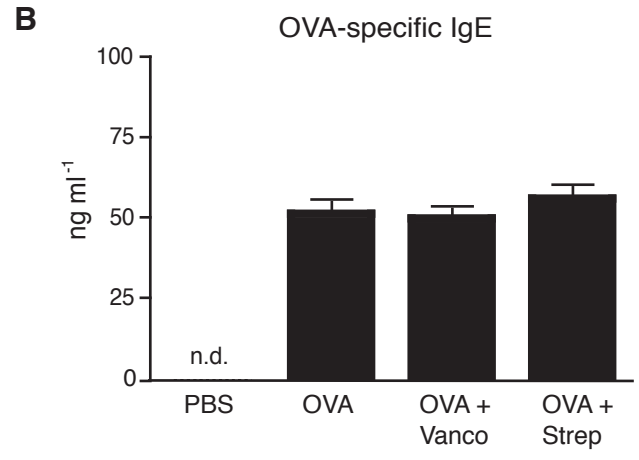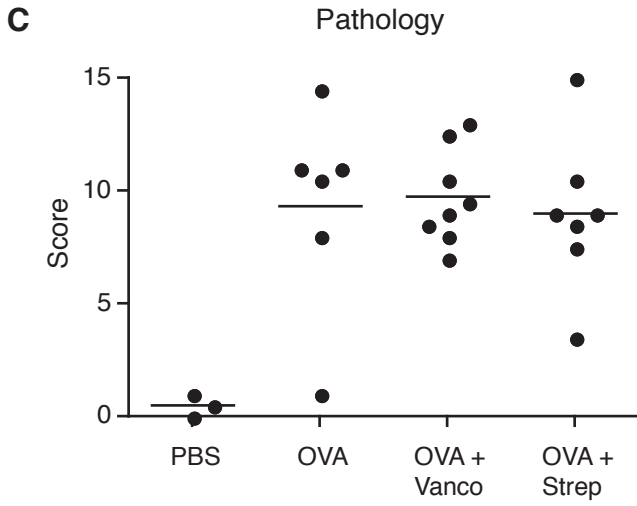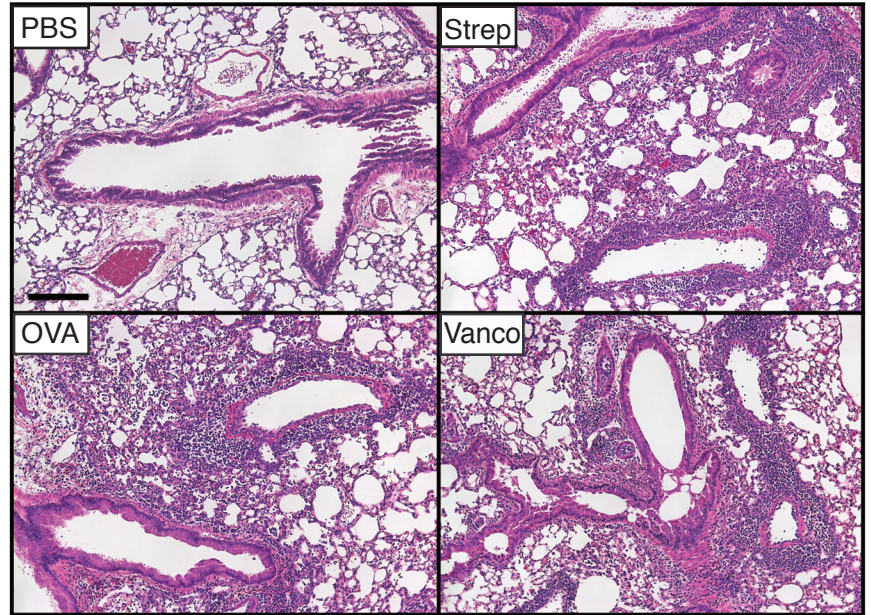

Pathology

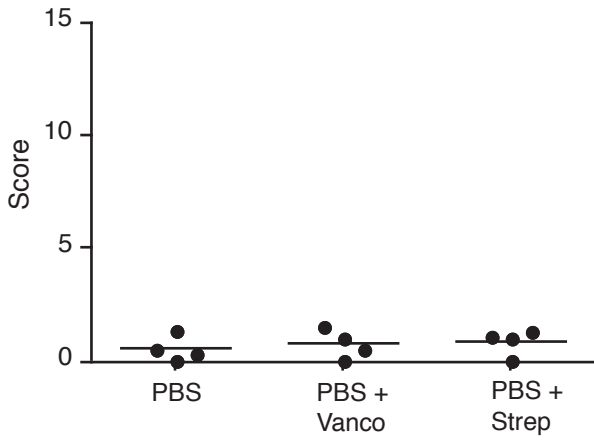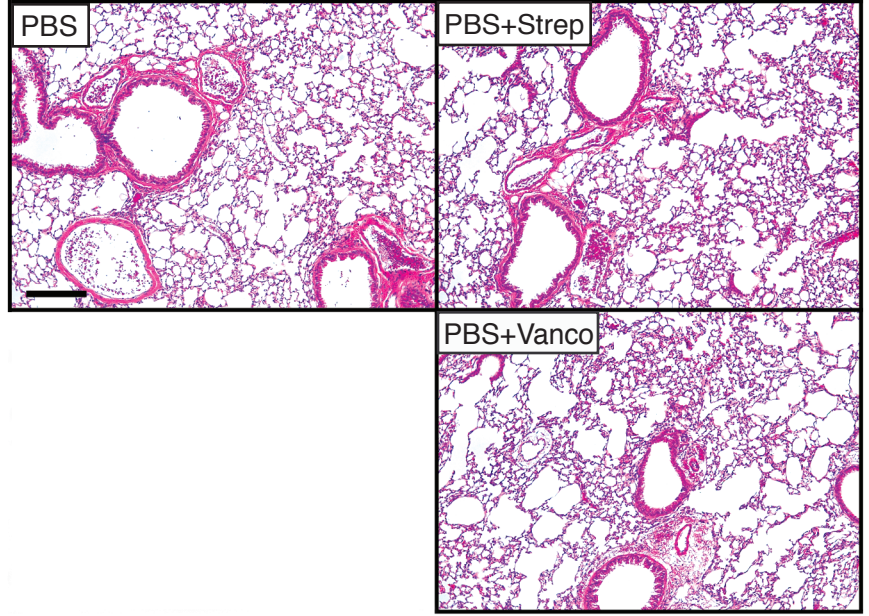

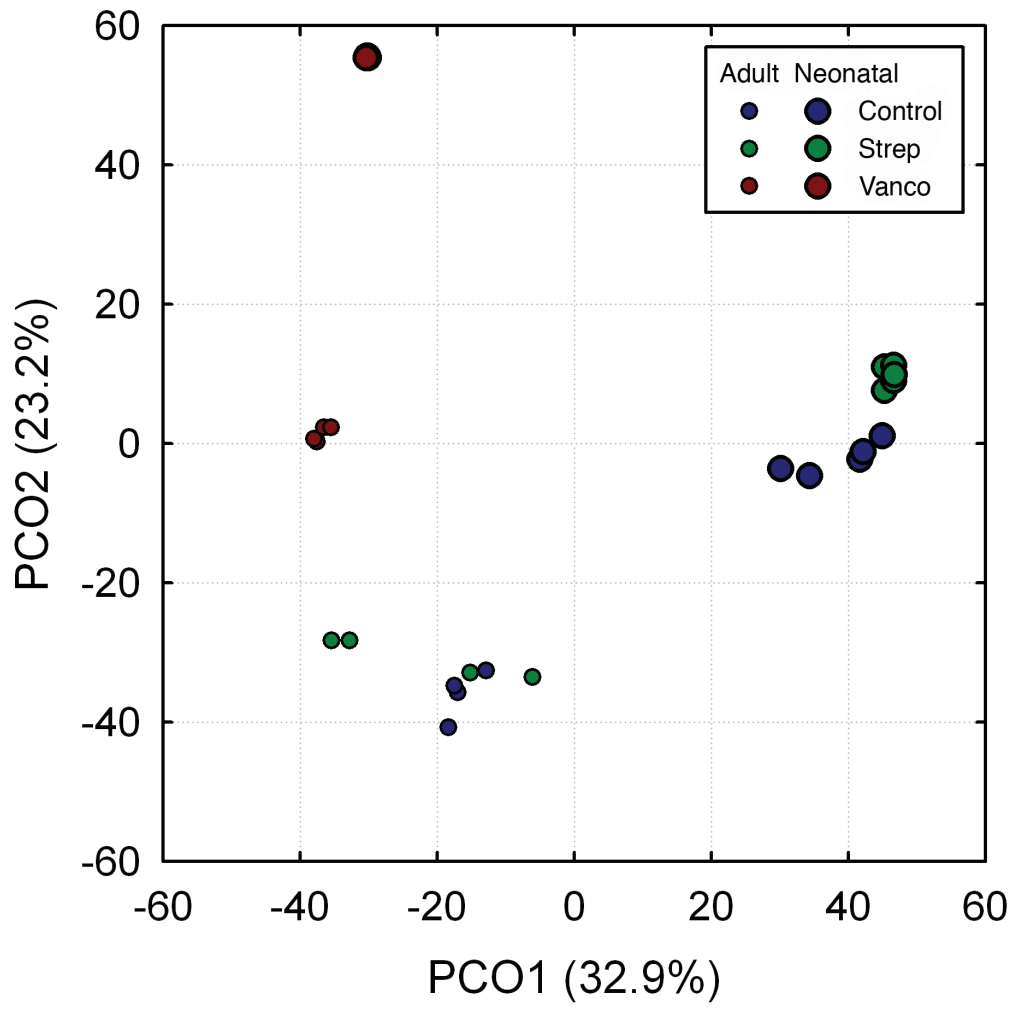

Supplement: embor201232s1.pdf [file embor201232s1.pdf]
